# Supplementary material for: 4,9- and 4,10-Substituted pyrenes: synthesis, successful isolation, and optoelectronic properties
Source: Royal Society of Chemistry journal article supplement (doi:10.1039/d3ob01936e), 2024-01-01
Supplement: d3ob01936e1.pdf [file d3ob01936e1.pdf]

**Electronic Supplementary Information for**

**4,9- and 4,10- Substituted Pyrenes: Synthesis, Successful Isolation, and Optoelectronic Properties**

Leibo Tan, Xiuli Zheng, Junqing Shi, Tianshi Qin,\* Lei Ji\*

**Contents**

|                                                         |     |
|---------------------------------------------------------|-----|
| Synthesis.....                                          | S2  |
| Electrochemistry.....                                   | S11 |
| Photophysics.....                                       | S14 |
| Theoretical studies.....                                | S18 |
| <sup>1</sup> H and <sup>13</sup> C NMR spectra .....    | S20 |
| Cartesian coordinates of all optimized structures ..... | S33 |

# Synthesis

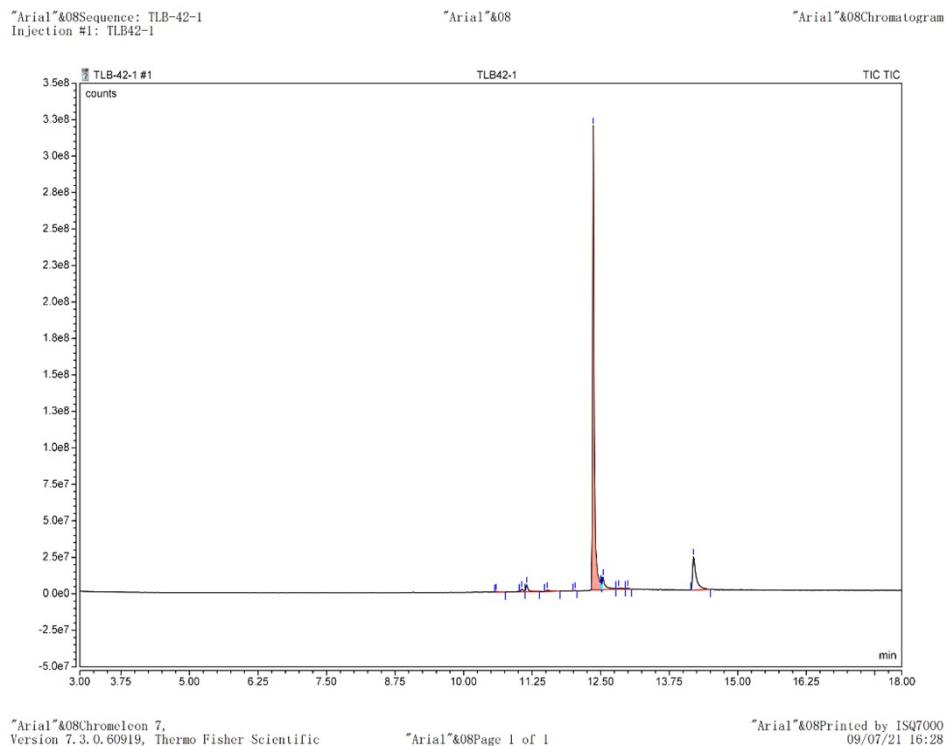

**Figure S1.** The gas chromatogram of 1,2,3,6,7,8-hexahydropyrene brominated with 2 eq of bromine.

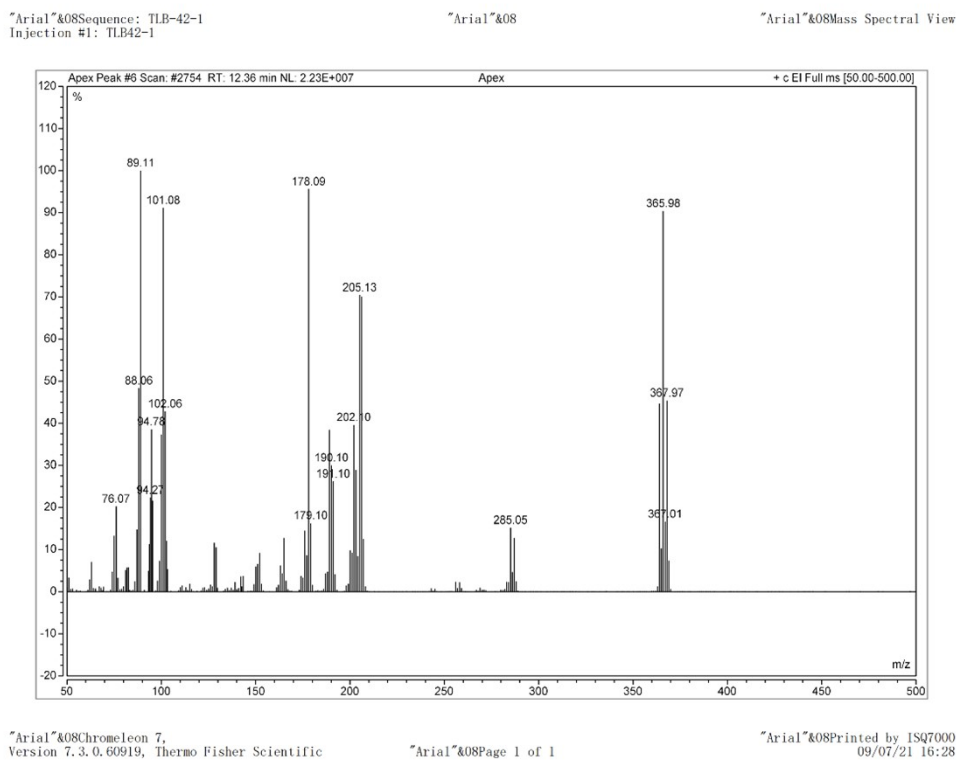

**Figure S2.** The mass spectrum at 12.5 minutes of the gas chromatograph in **Figure S1**.

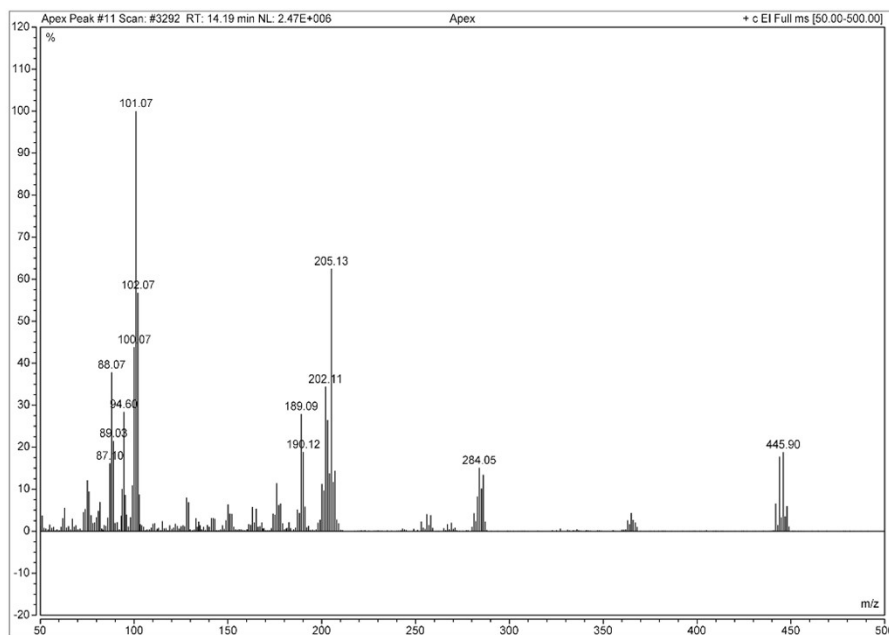

**Figure S3.** The mass spectrum at 14 minutes of the gas chromatograph in **Figure S1**.

Figure S4. <sup>1</sup>H NMR spectrum (500-MHz, CDCl<sub>3</sub>) of 1,2,3,6,7,8-hexahydropyrene brominated with 2 eq. bromine.

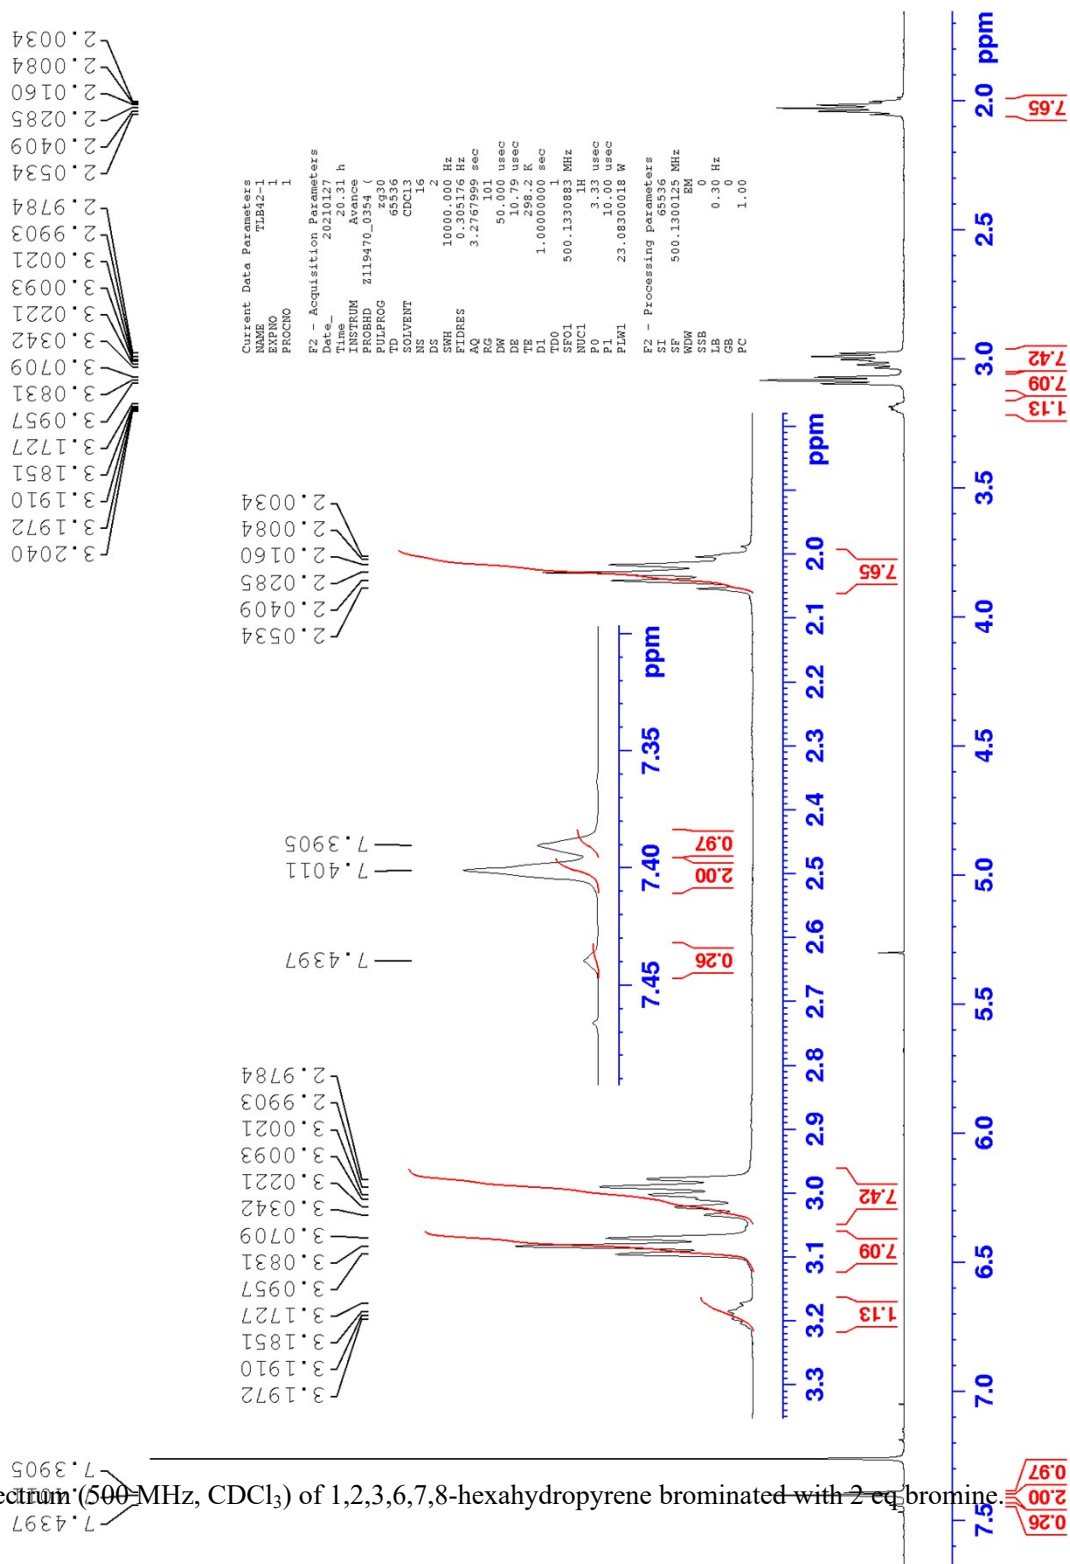

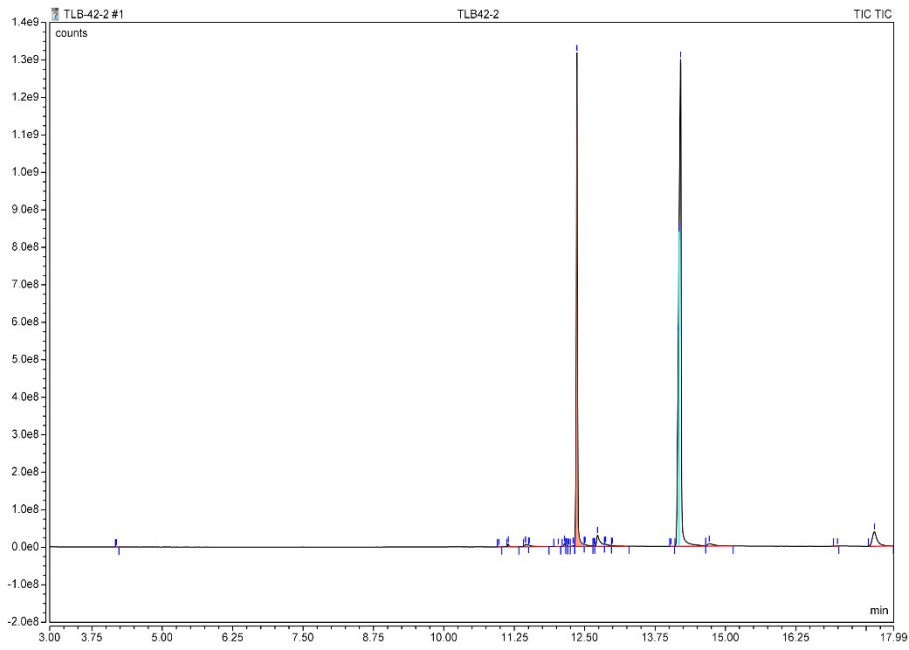

**Figure S5.** The gas chromatogram of 1,2,3,6,7,8-hexahydropyrene brominated with 3 eq bromine.

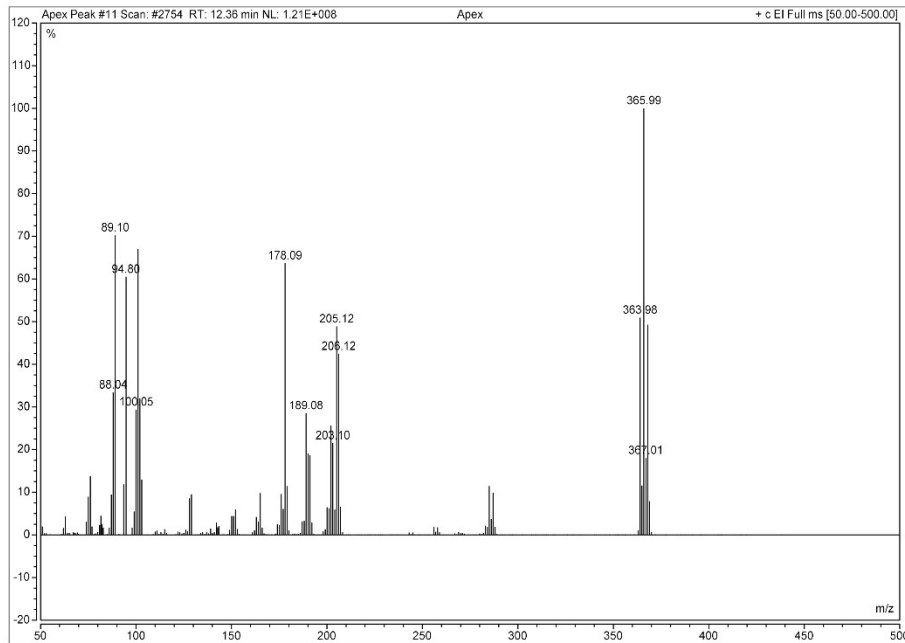

**Figure S6.** The mass spectrum at 12.5 minutes of the gas chromatograph shown in **Figure S5**.

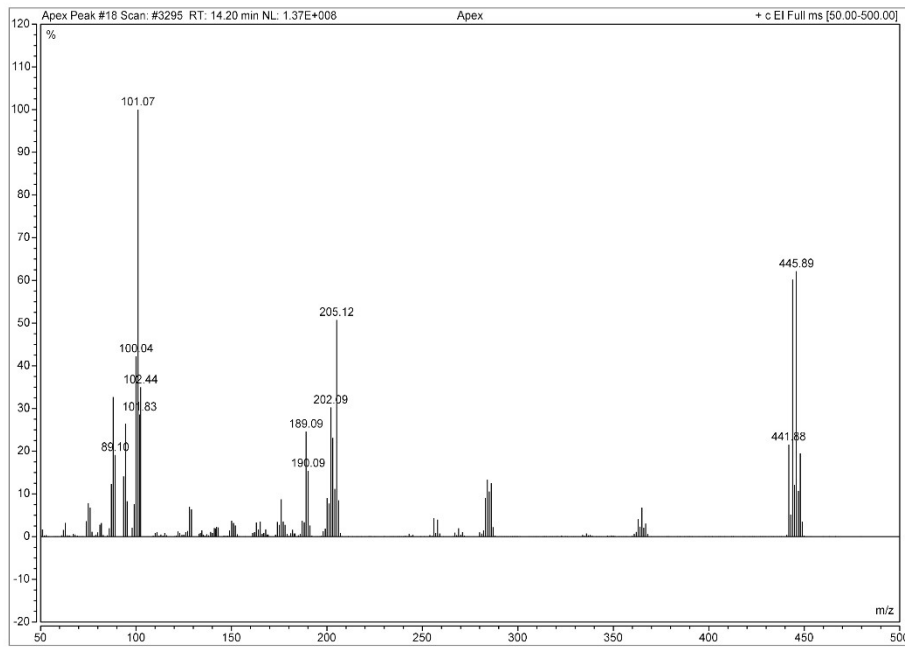

**Figure S7.** The mass spectrum at 14 minutes of the gas chromatograph shown in **Figure S5**.

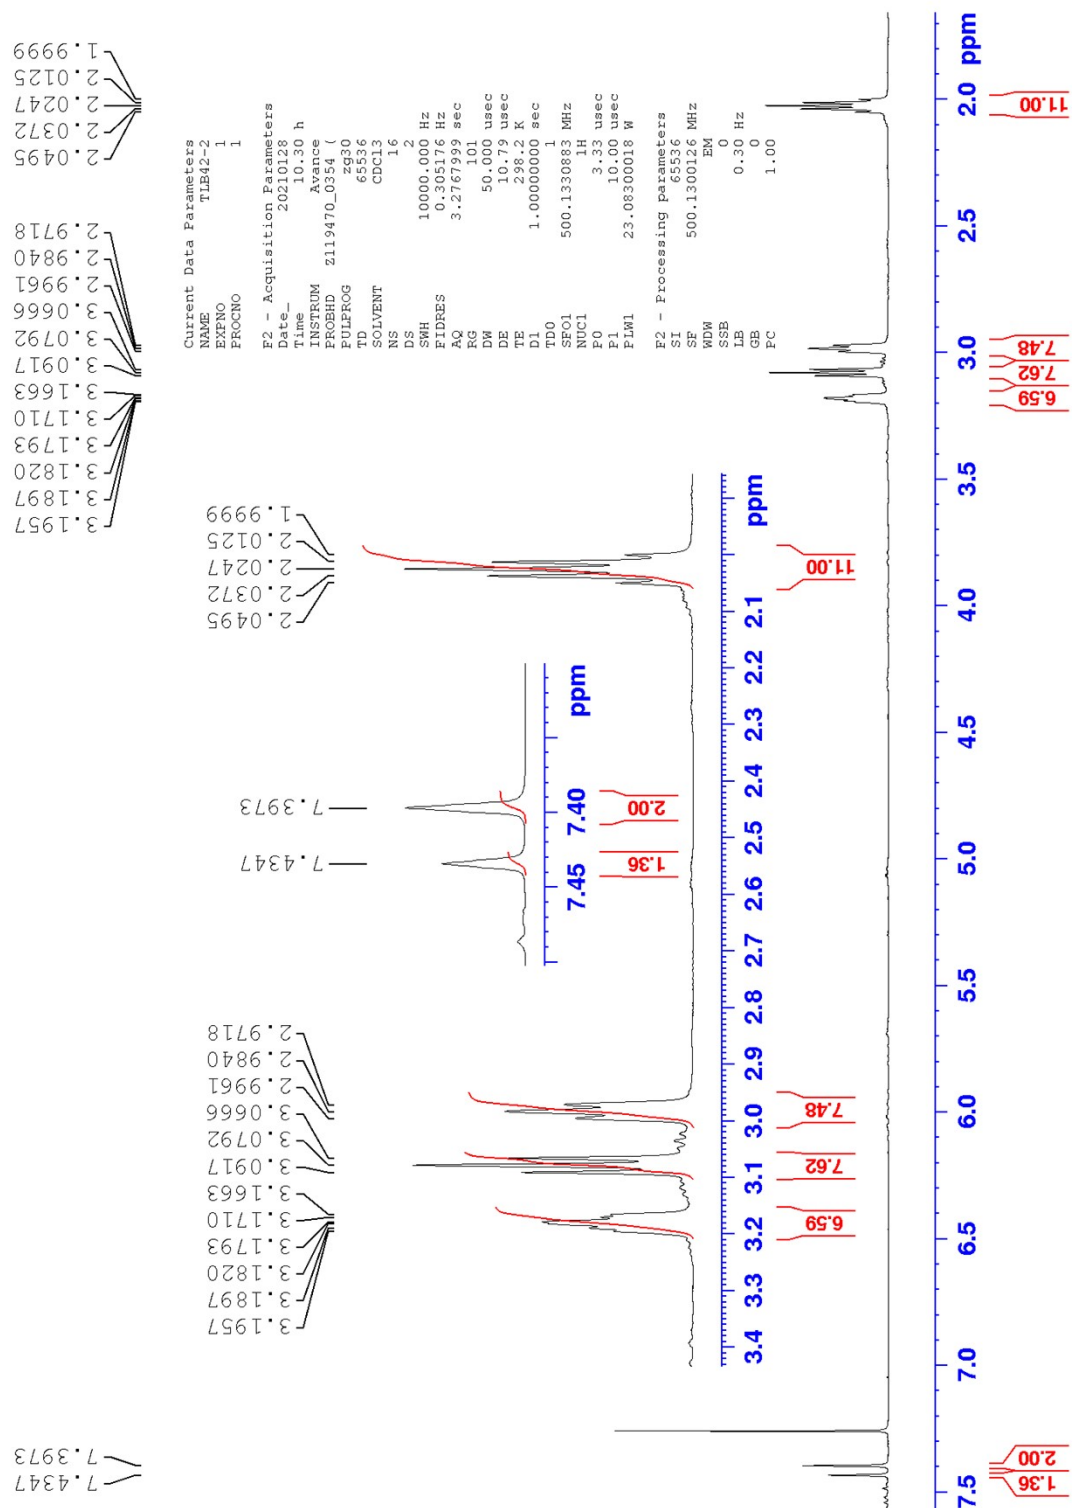

**Figure S8.**  $^1\text{H}$  NMR spectrum (500 MHz,  $\text{CDCl}_3$ ) of compound 1,2,3,6,7,8-hexahydropyrene brominated with 3 eq of bromine.

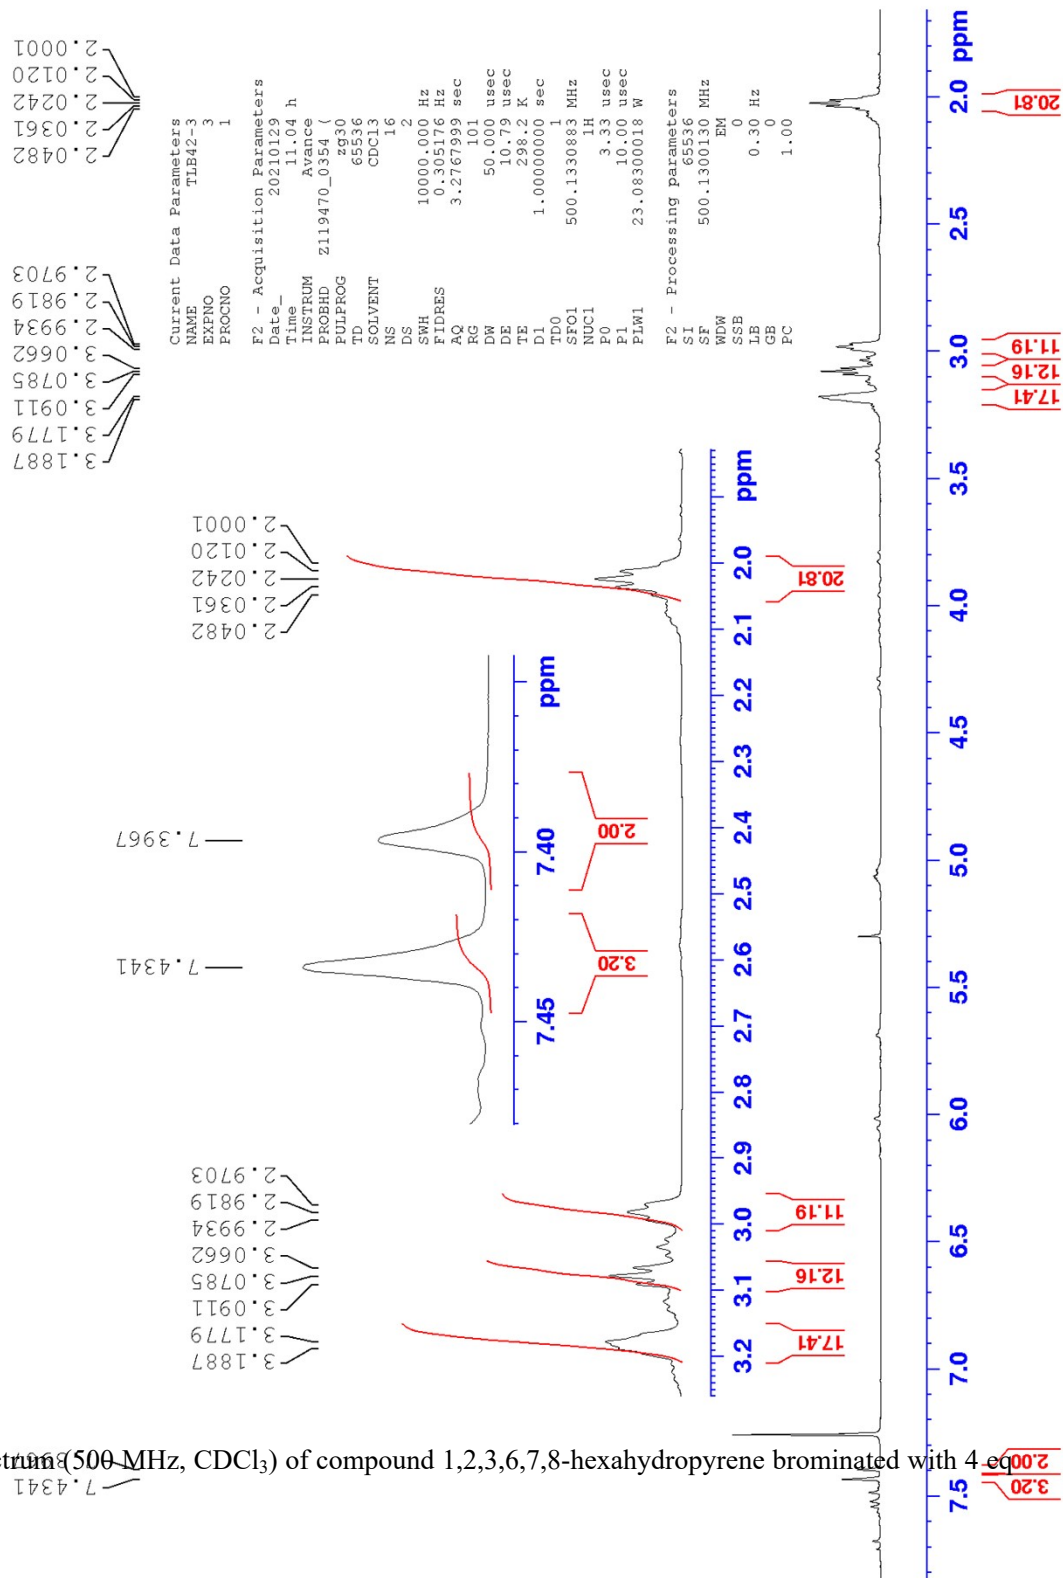

**Figure S9.**  $^1\text{H}$  NMR spectrum (500 MHz,  $\text{CDCl}_3$ ) of compound 1,2,3,6,7,8-hexahydropyrene brominated with 4 equivalents of bromine.



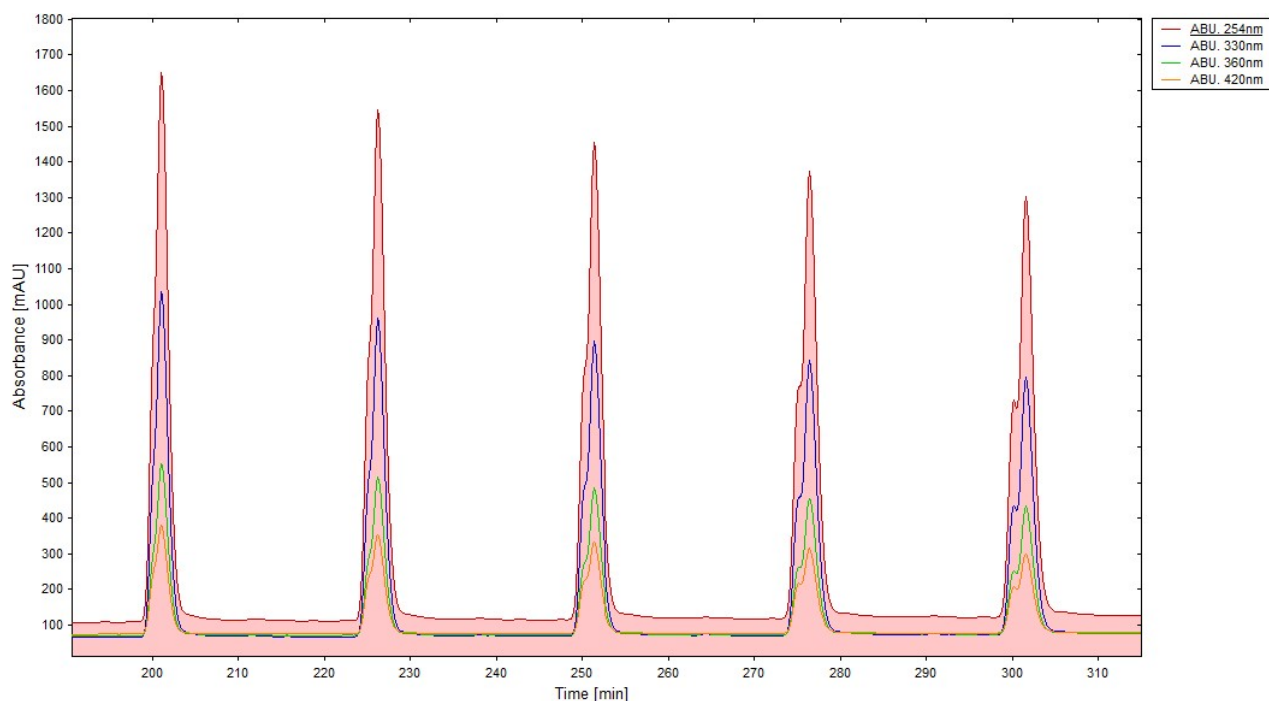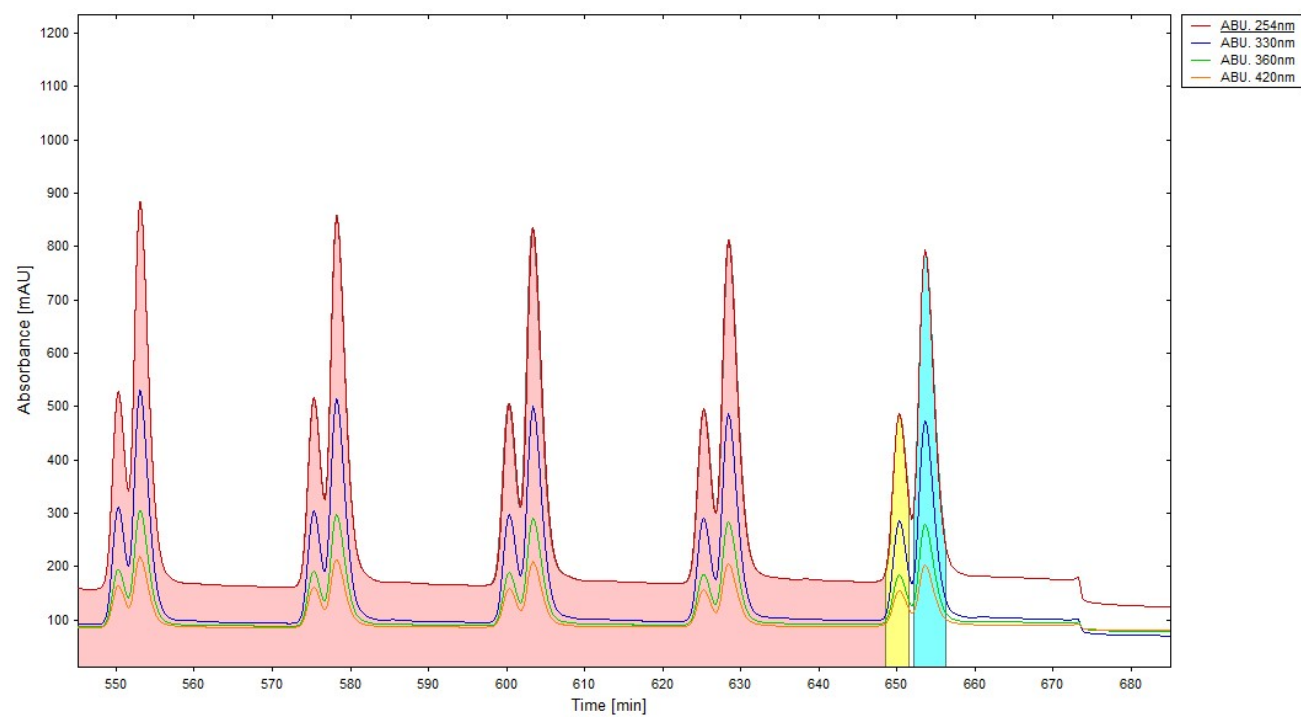

**Figure S10.** The separation of **1** and **2** on a Recycling Preparative SEC.

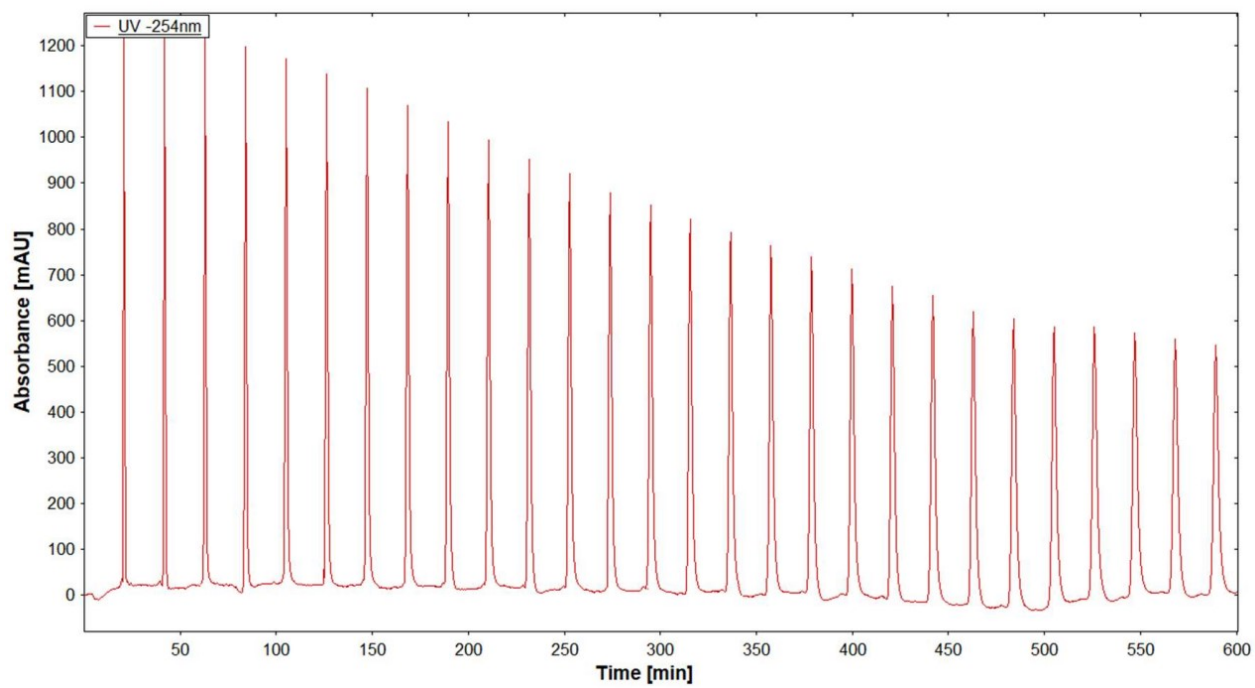

**Figure S11.** The separation of **3** and **6** by Recycling Preparative SEC.

## Electrochemistry

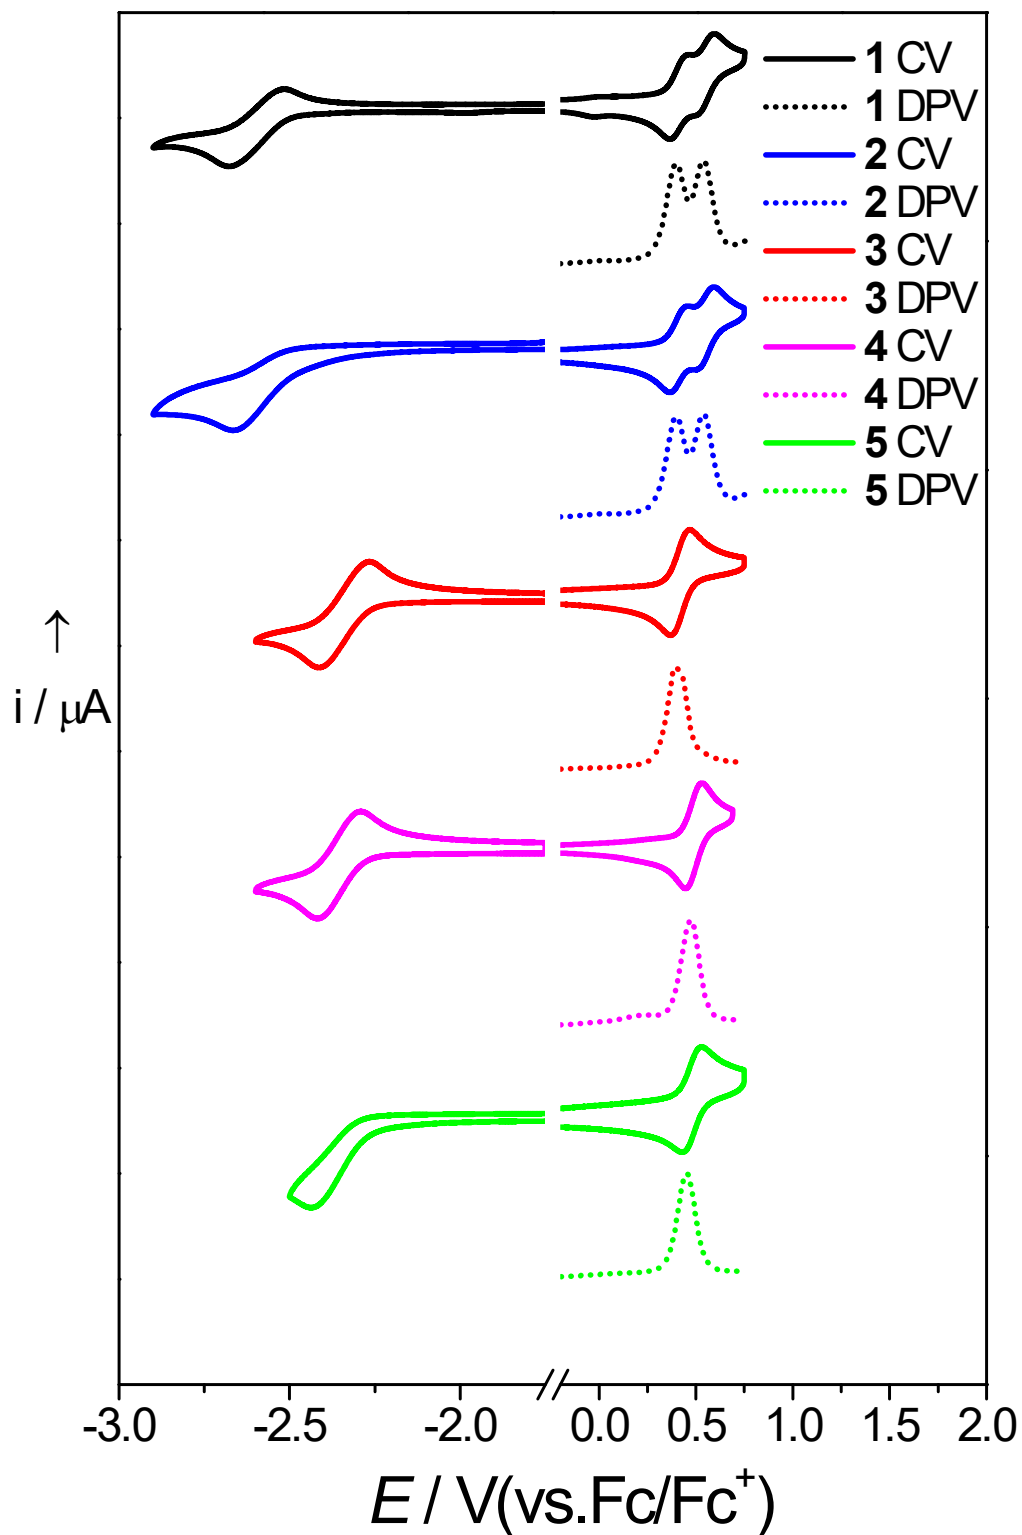

**Figure S12.** Cyclic voltammograms (solid line) and differential pulse voltammetry (dashed lined) of compounds 1-5. The reduction potentials were measured in THF and the oxidation potentials were measured in dichloromethane.

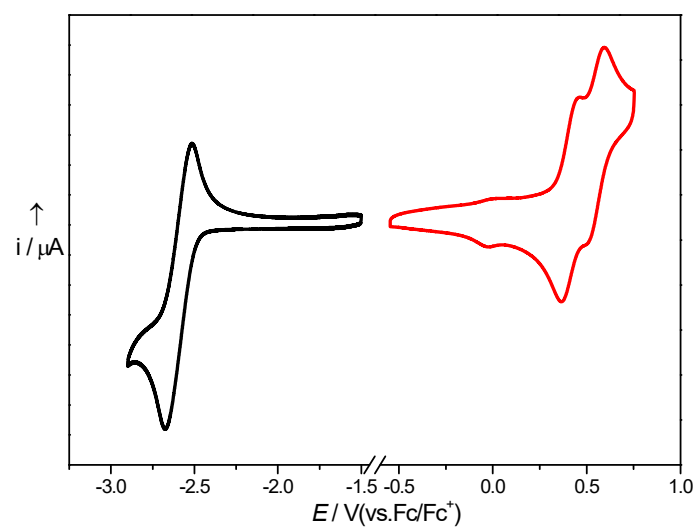

**Figure S13.** Cyclic voltammograms of compound **1** in THF (black) and dichloromethane (red).

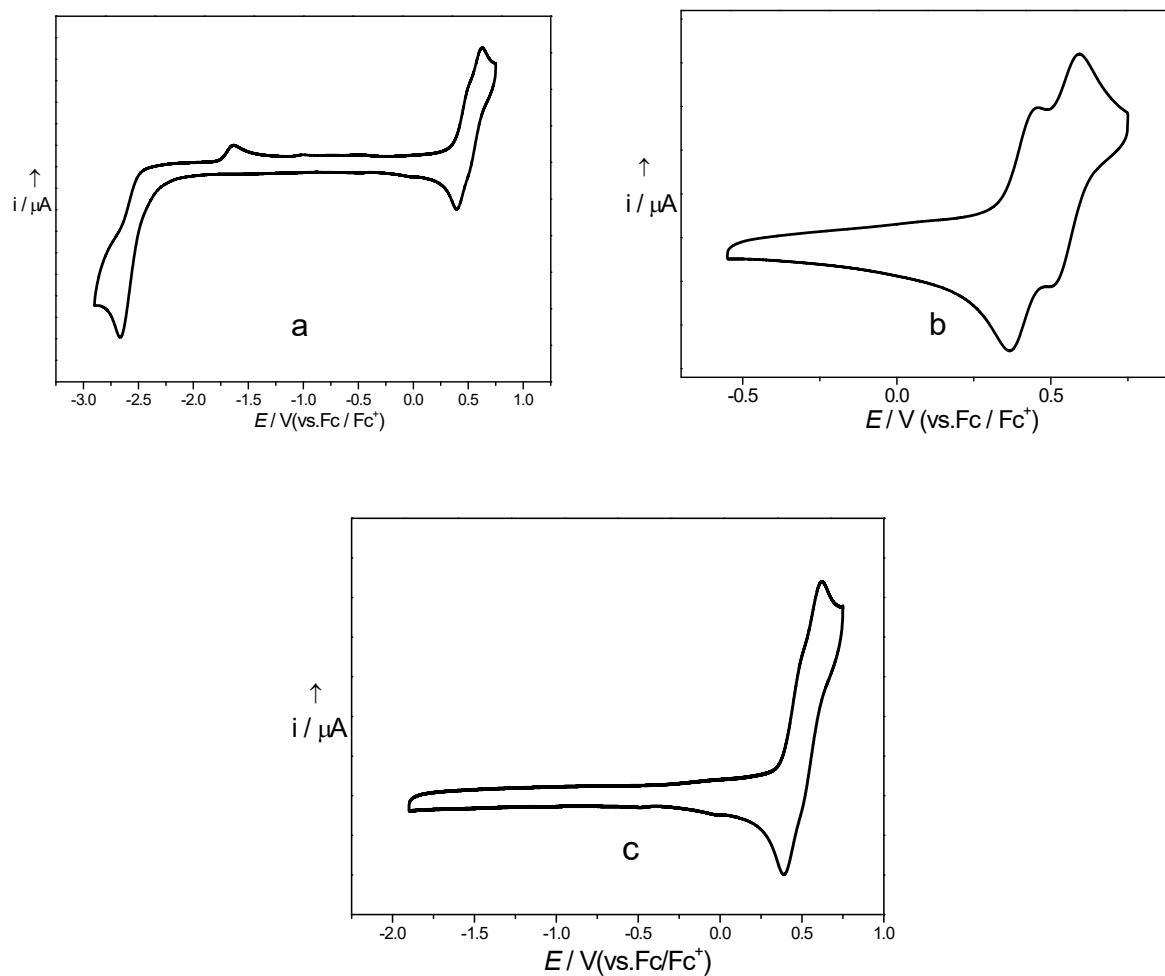

**Figure S14.** Cyclic voltammograms of compound **2** in THF (a and b) and dichloromethane (c).

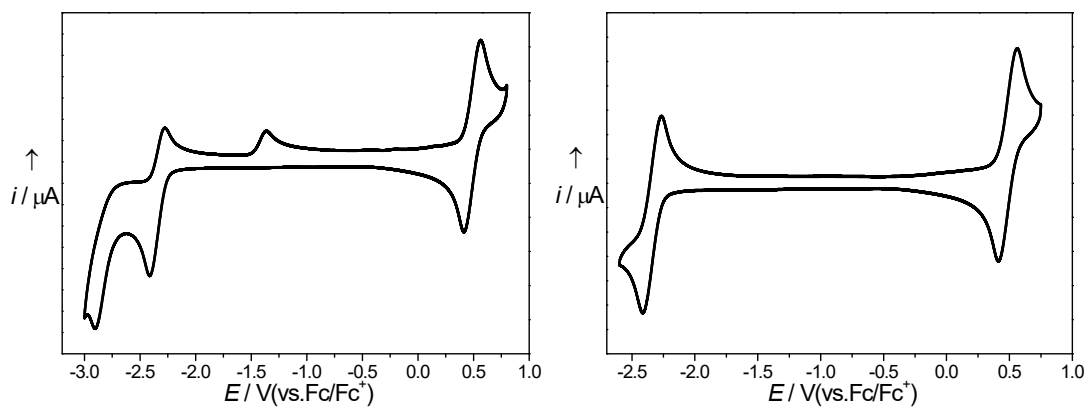

**Figure S15.** Cyclic voltammograms of compound **3** in THF.

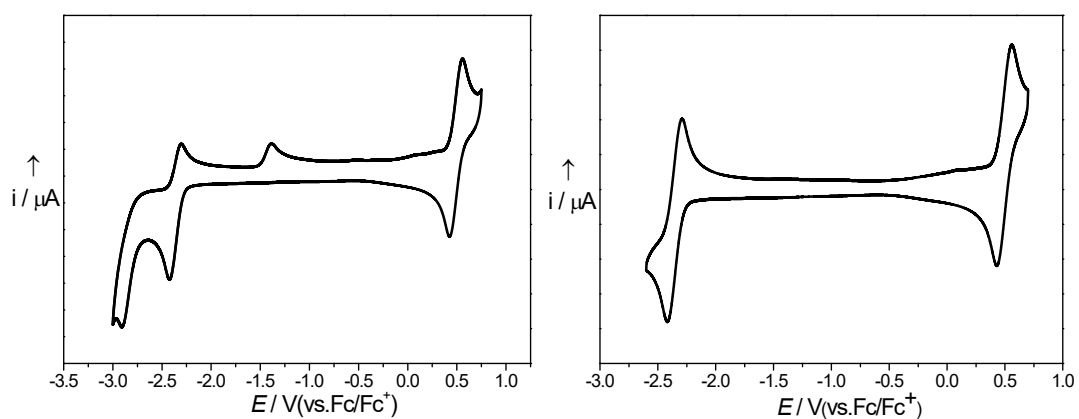

**Figure S16.** Cyclic voltammograms of compound **4** in THF.

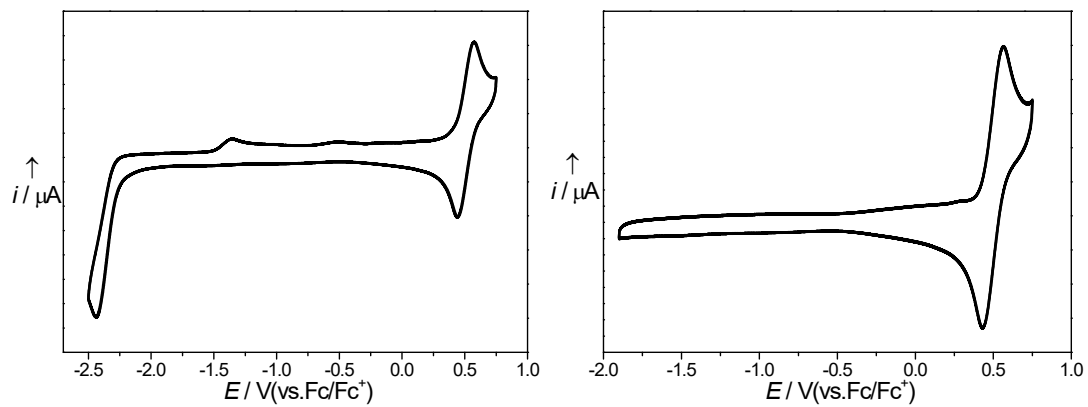

**Figure S17.** Cyclic voltammograms of compound **5** in THF.

## Photophysics

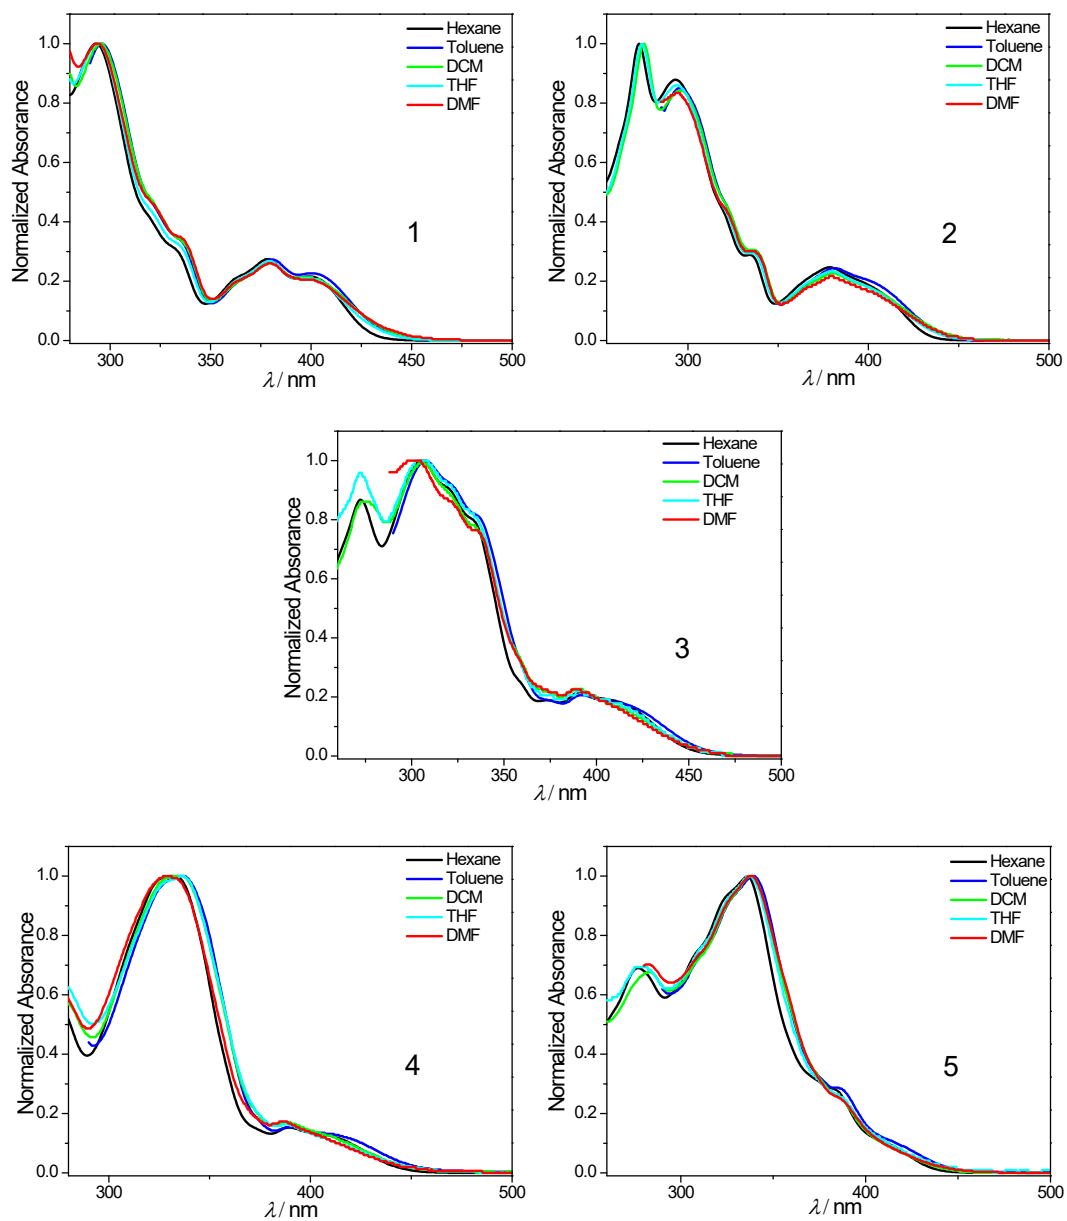

**Figure S18.** Absorption spectra of compounds **1-5** in hexane, toluene, DCM, THF and DMF.

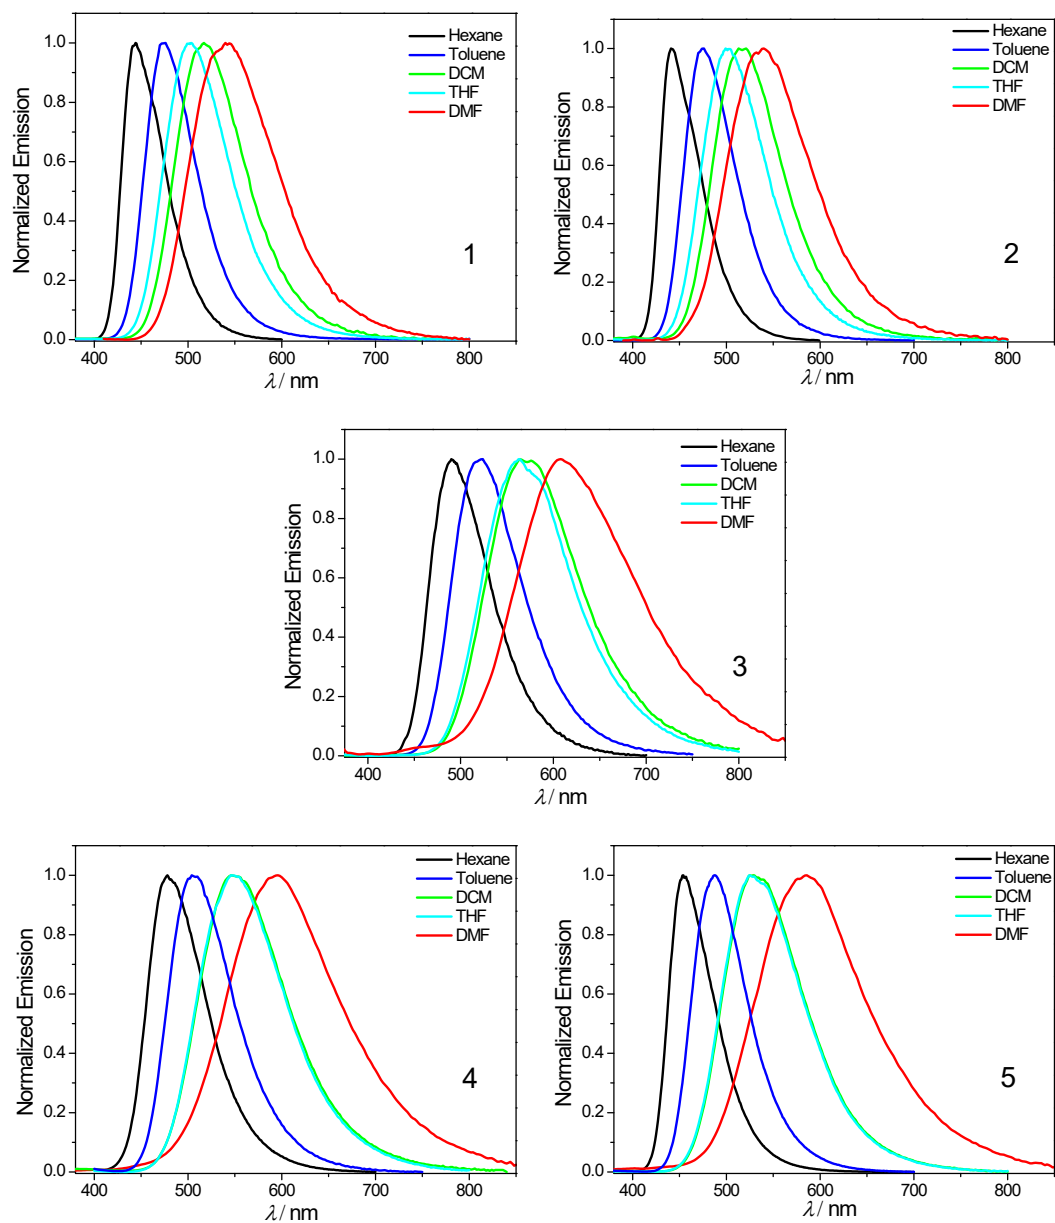

**Figure S19.** Fluorescence spectra of compounds 1-5 in hexane, toluene, DCM, THF, and DMF.

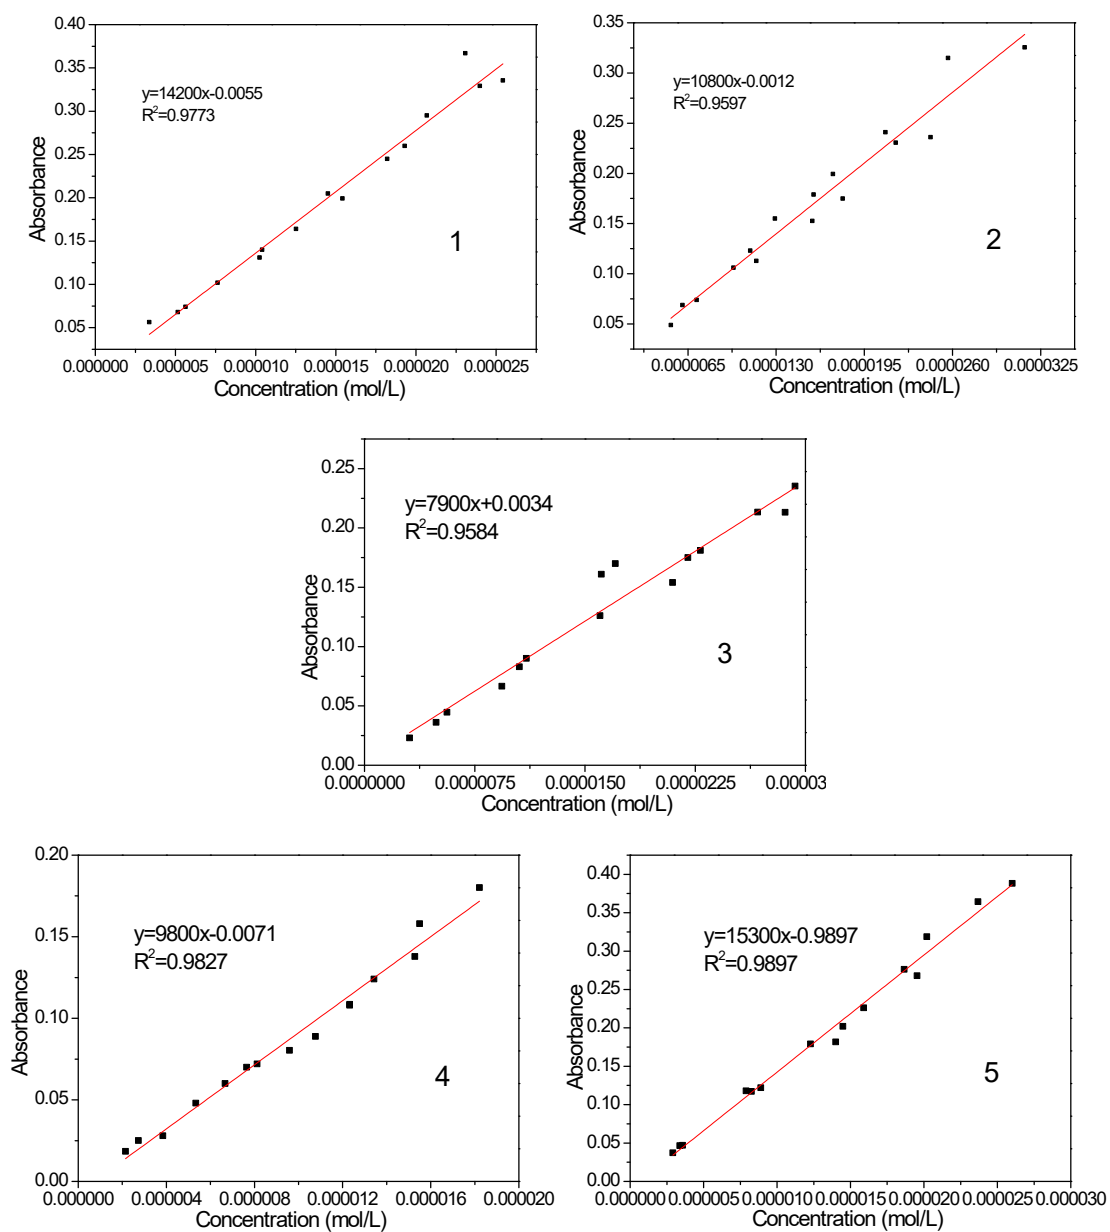

**Figure S20.** The absorbance dependence of compounds 1-5 in hexane on concentrations (1 & 2 at 379 nm, 3 at 391 nm, 4 at 390 nm, and 5 at 385 nm). The slope of the fitted line (in red) is the molar extinction coefficient of the corresponding compound at designated wavelength.



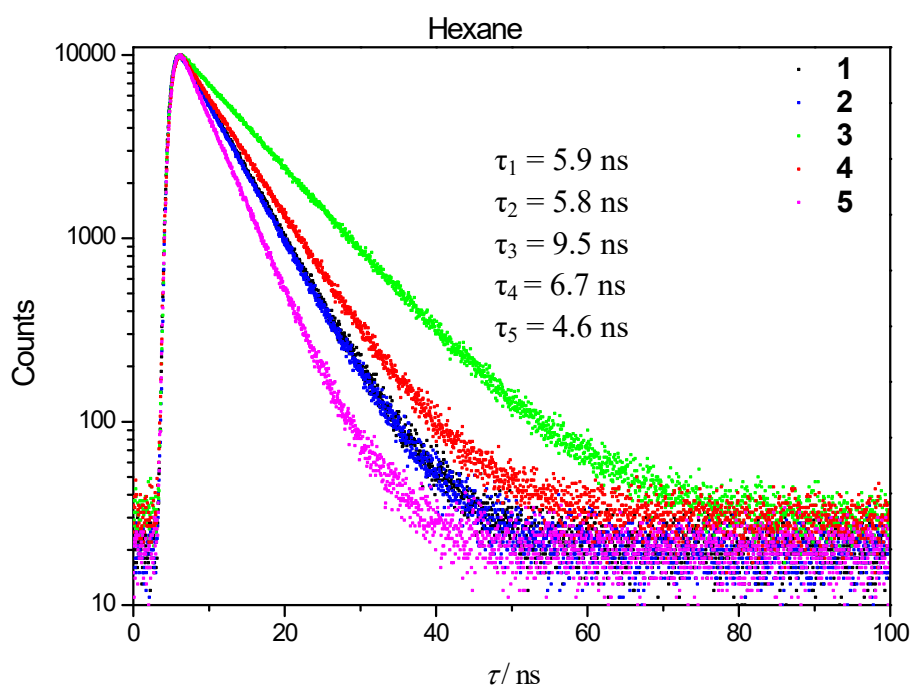

Figure S21. Fluorescence decay of compounds 1-5 in hexane (excited at 293.6 nm).

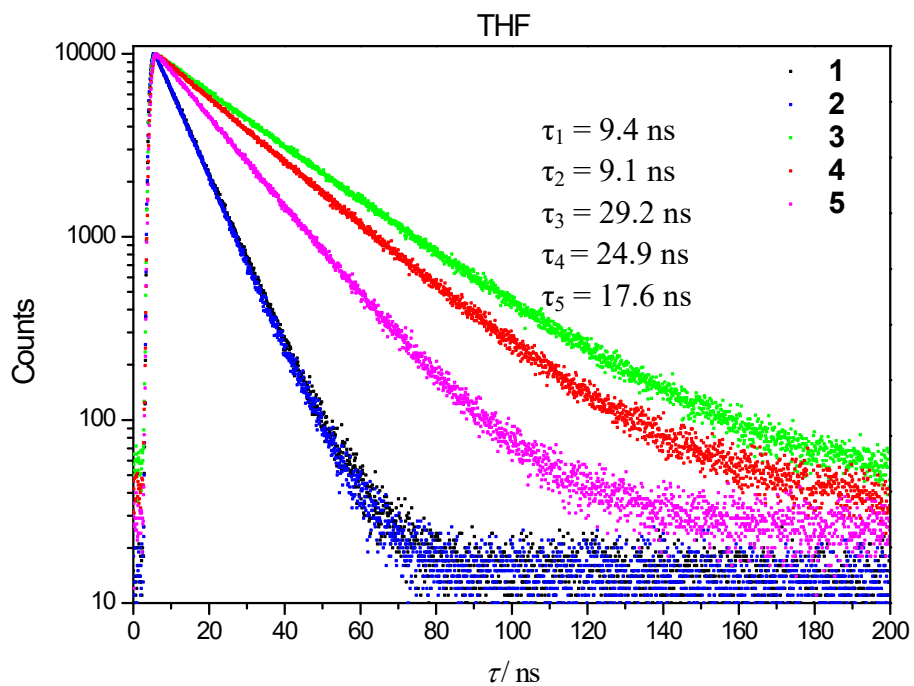

Figure S22. Fluorescence decay of compounds 1-5 in THF (excited at 293.6 nm).

## Theoretical studies

**Table S1.** TD-DFT calculations results of compound **1** in gas phase.

| Excited State | $\Delta E / \text{eV}$ | $\lambda / \text{nm}$ | Oscillator strength | Transitions                   | Contribution |
|---------------|------------------------|-----------------------|---------------------|-------------------------------|--------------|
| S1            | 3.5430                 | 349.94                | 0.3887              | <b>HOMO</b> → <b>LUMO</b>     | <b>88%</b>   |
| S2            | 3.6126                 | 343.20                | 0.0000              | <b>HOMO-1</b> → <b>LUMO</b>   | <b>89%</b>   |
| S3            | 3.8910                 | 318.65                | 0.0625              | <b>HOMO-3</b> → <b>LUMO</b>   | <b>26%</b>   |
|               |                        |                       |                     | <b>HOMO</b> → <b>LUMO+1</b>   | <b>44%</b>   |
| S4            | 4.2046                 | 294.88                | 0.1505              | <b>HOMO-2</b> → <b>LUMO</b>   | <b>71%</b>   |
| S5            | 4.5208                 | 274.25                | 0.0001              | <b>HOMO-1</b> → <b>LUMO+1</b> | <b>45%</b>   |
|               |                        |                       |                     | HOMO-1→LUMO+6                 | 15%          |
|               |                        |                       |                     | HOMO→LUMO+2                   | 10%          |
|               |                        |                       |                     | HOMO→LUMO+5                   | 13%          |

**Table S2.** TD-DFT calculations results of compound **2** in gas phase.

| Excited State | $\Delta E / \text{eV}$ | $\lambda / \text{nm}$ | Oscillator strength | Transitions                   | Contribution |
|---------------|------------------------|-----------------------|---------------------|-------------------------------|--------------|
| S1            | 3.5706                 | 347.24                | 0.1731              | <b>HOMO-1</b> → <b>LUMO</b>   | <b>84%</b>   |
| S2            | 3.5887                 | 345.48                | 0.2143              | <b>HOMO</b> → <b>LUMO</b>     | <b>91%</b>   |
| S3            | 3.9280                 | 315.64                | 0.0995              | HOMO-3→LUMO                   | 29%          |
|               |                        |                       |                     | HOMO-2→LUMO+1                 | 13%          |
|               |                        |                       |                     | <b>HOMO</b> → <b>LUMO+1</b>   | <b>49%</b>   |
| S4            | 4.1670                 | 297.54                | 0.0607              | <b>HOMO-2</b> → <b>LUMO</b>   | <b>82%</b>   |
| S5            | 4.5406                 | 273.06                | 0.0972              | <b>HOMO-1</b> → <b>LUMO+1</b> | <b>43%</b>   |
|               |                        |                       |                     | HOMO-1→LUMO+6                 | 12%          |
|               |                        |                       |                     | HOMO→LUMO+3                   | 11%          |
|               |                        |                       |                     | HOMO→LUMO+5                   | 13%          |

**Table S3.** TD-DFT calculations results of compound **3** in gas phase.

| Excited State | $\Delta E / \text{eV}$ | $\lambda / \text{nm}$ | Oscillator strength | Transitions                 | Contribution |
|---------------|------------------------|-----------------------|---------------------|-----------------------------|--------------|
| S1            | 3.4919                 | 355.07                | 0.3485              | <b>HOMO</b> → <b>LUMO</b>   | <b>82%</b>   |
| S2            | 3.6946                 | 335.58                | 0.0431              | <b>HOMO-1</b> → <b>LUMO</b> | <b>48%</b>   |
|               |                        |                       |                     | HOMO→LUMO+1                 | 29%          |
| S3            | 3.9734                 | 312.03                | 0.0212              | HOMO-3→LUMO                 | 23%          |
|               |                        |                       |                     | HOMO-2→LUMO                 | 13%          |
|               |                        |                       |                     | HOMO-1→LUMO+2               | 14%          |

|    |        |        |        |                                     |                   |
|----|--------|--------|--------|-------------------------------------|-------------------|
|    |        |        |        | <b>HOMO →LUMO+2</b>                 | <b>24%</b>        |
| S4 | 4.1197 | 300.95 | 0.0551 | HOMO-3→LUMO<br><b>HOMO-2→LUMO</b>   | 15%<br><b>44%</b> |
|    |        |        |        | HOMO-2→LUMO+1                       | 16%               |
| S5 | 4.2242 | 293.51 | 0.1660 | HOMO-1→LUMO<br><b>HOMO-1→LUMO+1</b> | 16%<br><b>38%</b> |
|    |        |        |        | HOMO →LUMO+1                        | 18%               |

**Table S4.** TD-DFT calculations results of compound **4** in gas phase.

| Excited State | $\Delta E / eV$ | $\lambda / nm$ | Oscillator strength | Transitions                                                                | Contribution                           |
|---------------|-----------------|----------------|---------------------|----------------------------------------------------------------------------|----------------------------------------|
| S1            | 3.5104          | 353.19         | 0.3996              | <b>HOMO →LUMO</b>                                                          | <b>78%</b>                             |
| S2            | 3.7052          | 334.63         | 0.0487              | <b>HOMO-1→LUMO</b><br>HOMO →LUMO+1                                         | <b>48%</b><br>25%                      |
| S3            | 3.9716          | 312.18         | 0.0270              | <b>HOMO-4→LUMO</b><br>HOMO-1→LUMO<br>HOMO-1→LUMO+3<br>HOMO →LUMO+3         | <b>26%</b><br>10%<br>14%<br>16%        |
| S4            | 4.1081          | 301.81         | 0.0752              | <b>HOMO-3→LUMO</b><br>HOMO-3→LUMO+1<br><b>HOMO-2→LUMO</b><br>HOMO-2→LUMO+1 | <b>28%</b><br>11%<br><b>28%</b><br>12% |
| S5            | 4.1785          | 296.72         | 0.7321              | HOMO →LUMO+2                                                               | 67%                                    |

**Table S5.** TD-DFT calculations results of compound **5** in gas phase.

| Excited State | $\Delta E / eV$ | $\lambda / nm$ | Oscillator strength | Transitions                                                                         | Contribution                           |
|---------------|-----------------|----------------|---------------------|-------------------------------------------------------------------------------------|----------------------------------------|
| S1            | 3.5476          | 349.48         | 0.1952              | <b>HOMO →LUMO</b><br>HOMO →LUMO+1                                                   | <b>73%</b><br>10%                      |
| S2            | 3.7227          | 333.05         | 0.3563              | <b>HOMO-1→LUMO</b><br>HOMO →LUMO+1                                                  | <b>52%</b><br>26%                      |
| S3            | 3.9027          | 317.68         | 0.0523              | <b>HOMO-4→LUMO</b><br>HOMO-1→LUMO<br>HOMO-1→LUMO+1<br>HOMO-1→LUMO+3<br>HOMO →LUMO+3 | <b>26%</b><br>12%<br>10%<br>11%<br>11% |
| S4            | 4.1141          | 301.36         | 0.0638              | HOMO-3→LUMO<br>HOMO-3→LUMO+1<br><b>HOMO-2→LUMO</b><br>HOMO-2→LUMO+1                 | 29%<br>12%<br><b>30%</b><br>12%        |
| S5            | 4.1833          | 296.38         | 0.9432              | <b>HOMO →LUMO+2</b>                                                                 | <b>68%</b>                             |

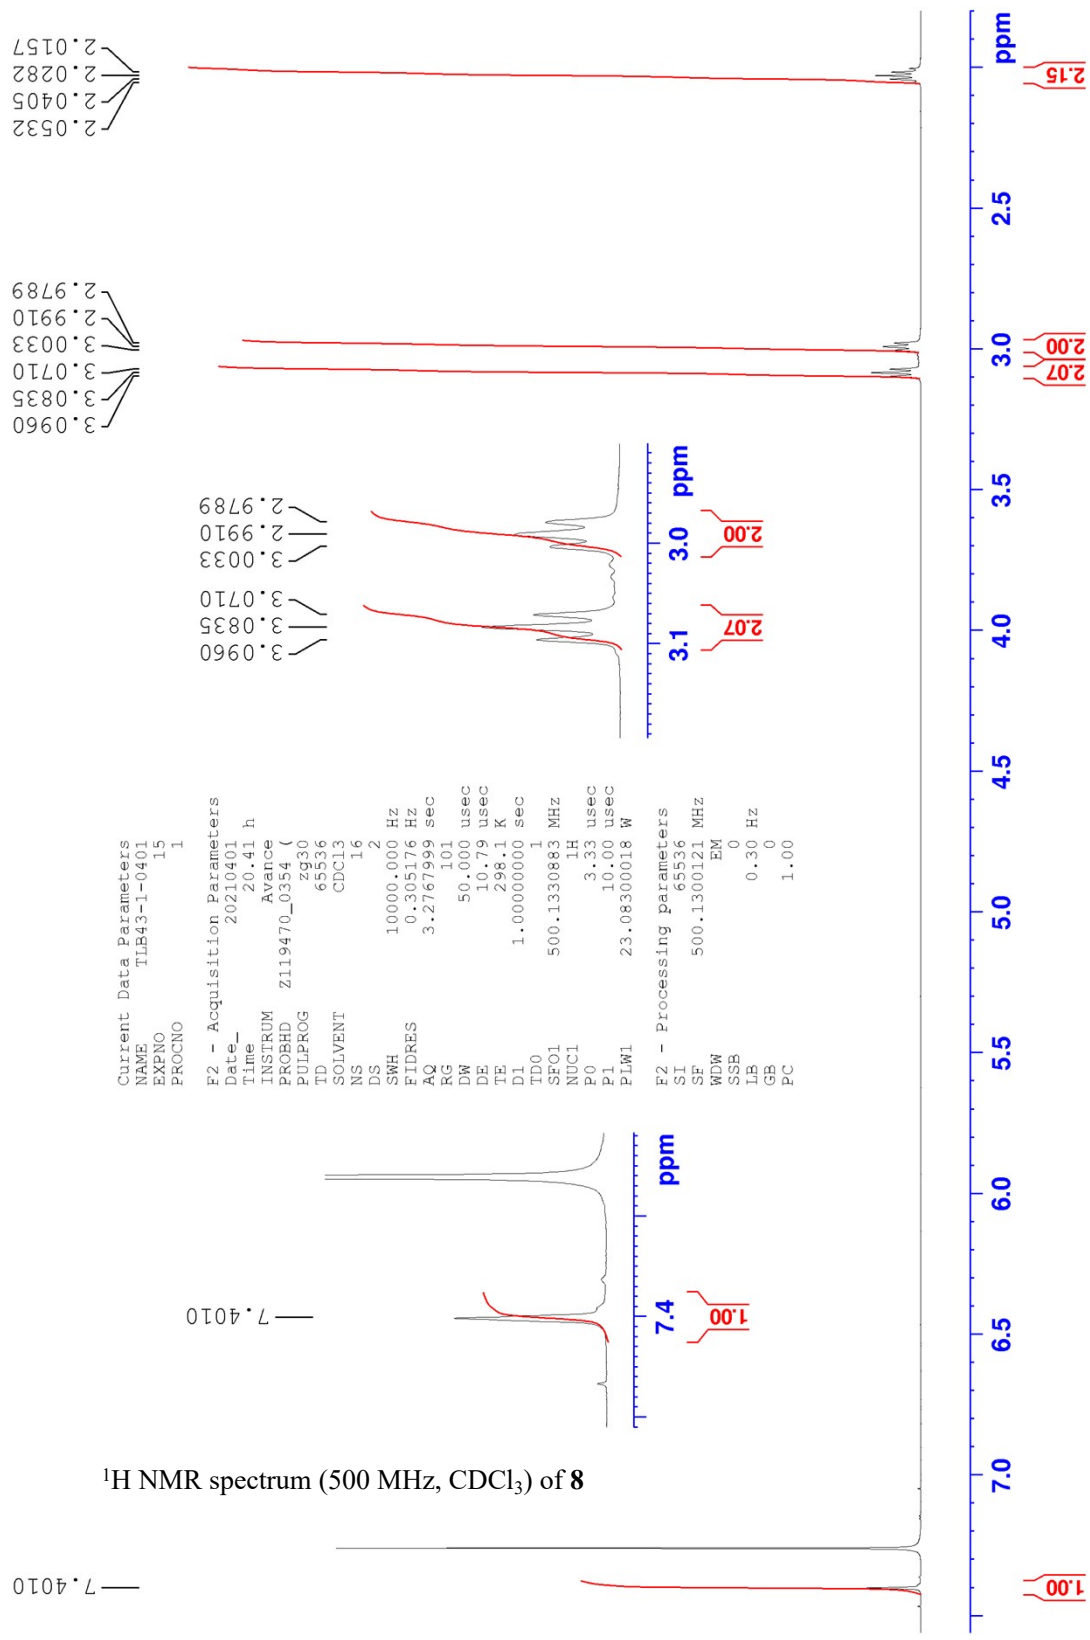

<sup>1</sup>H NMR spectrum (500 MHz, CDCl<sub>3</sub>) of **8** and **9** mixture

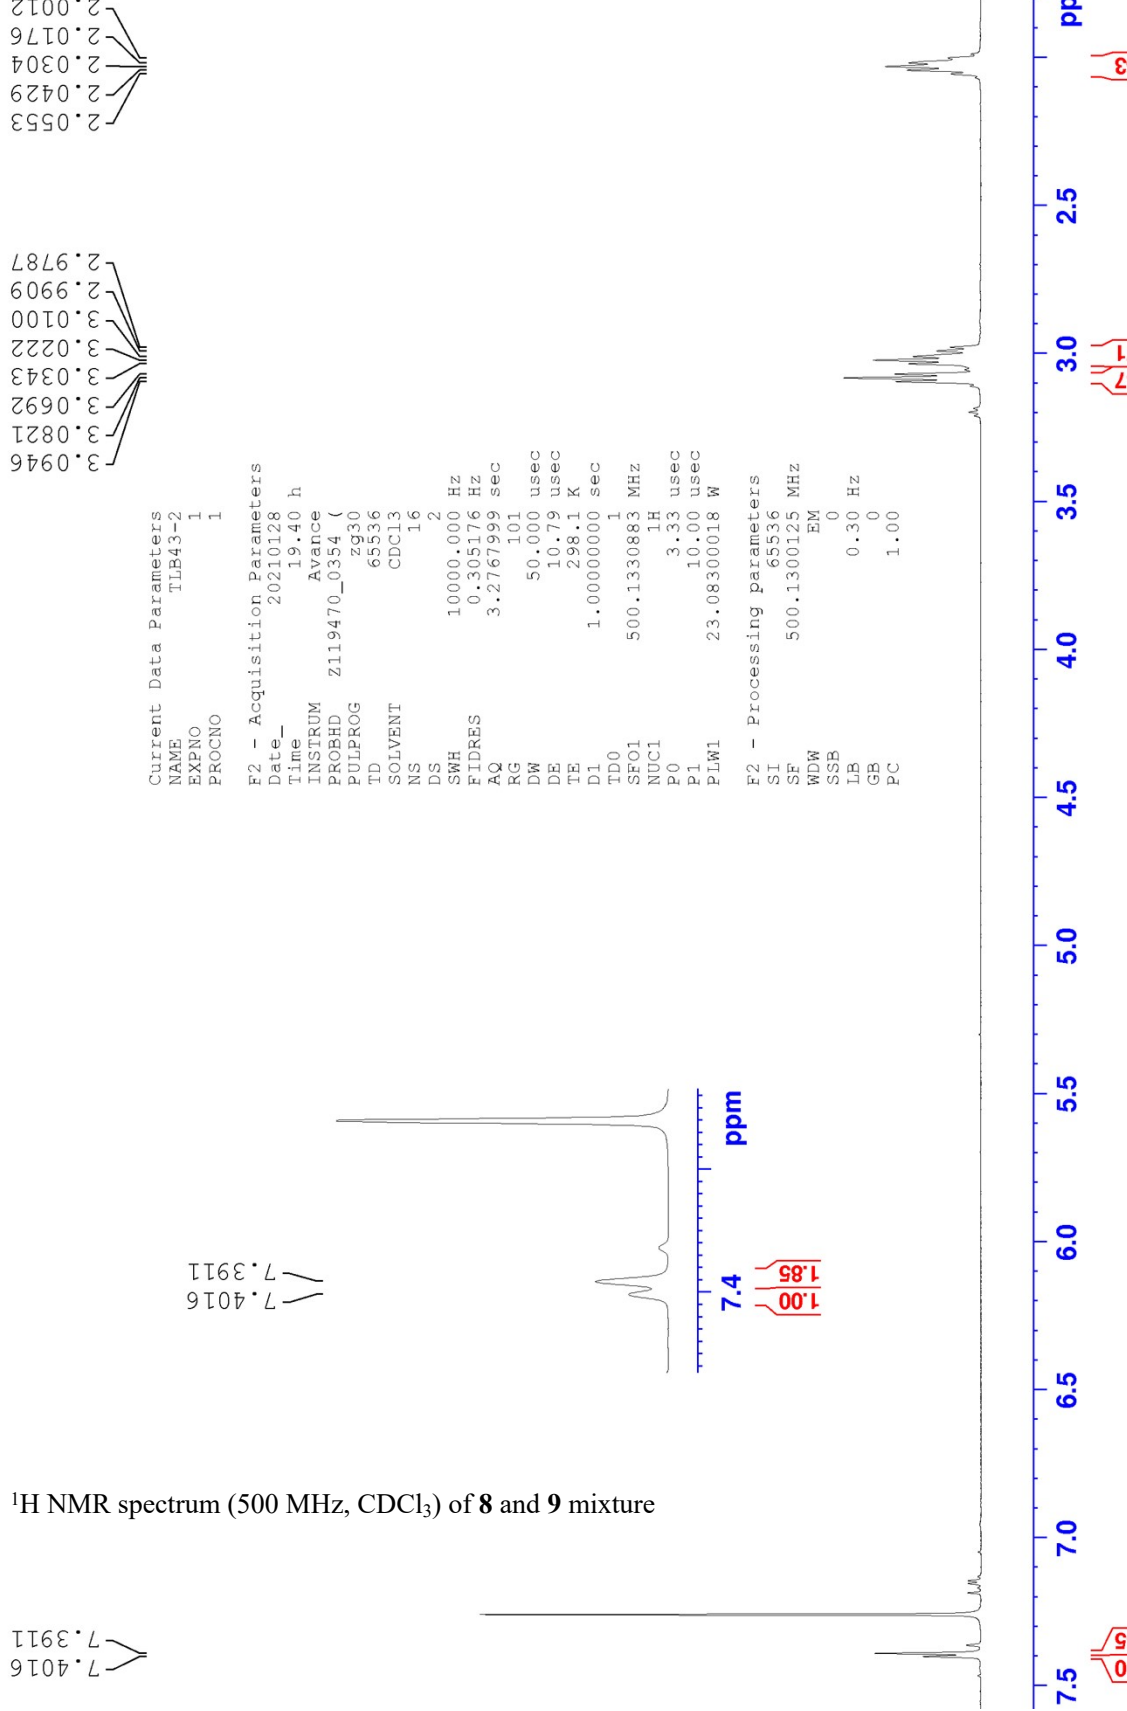

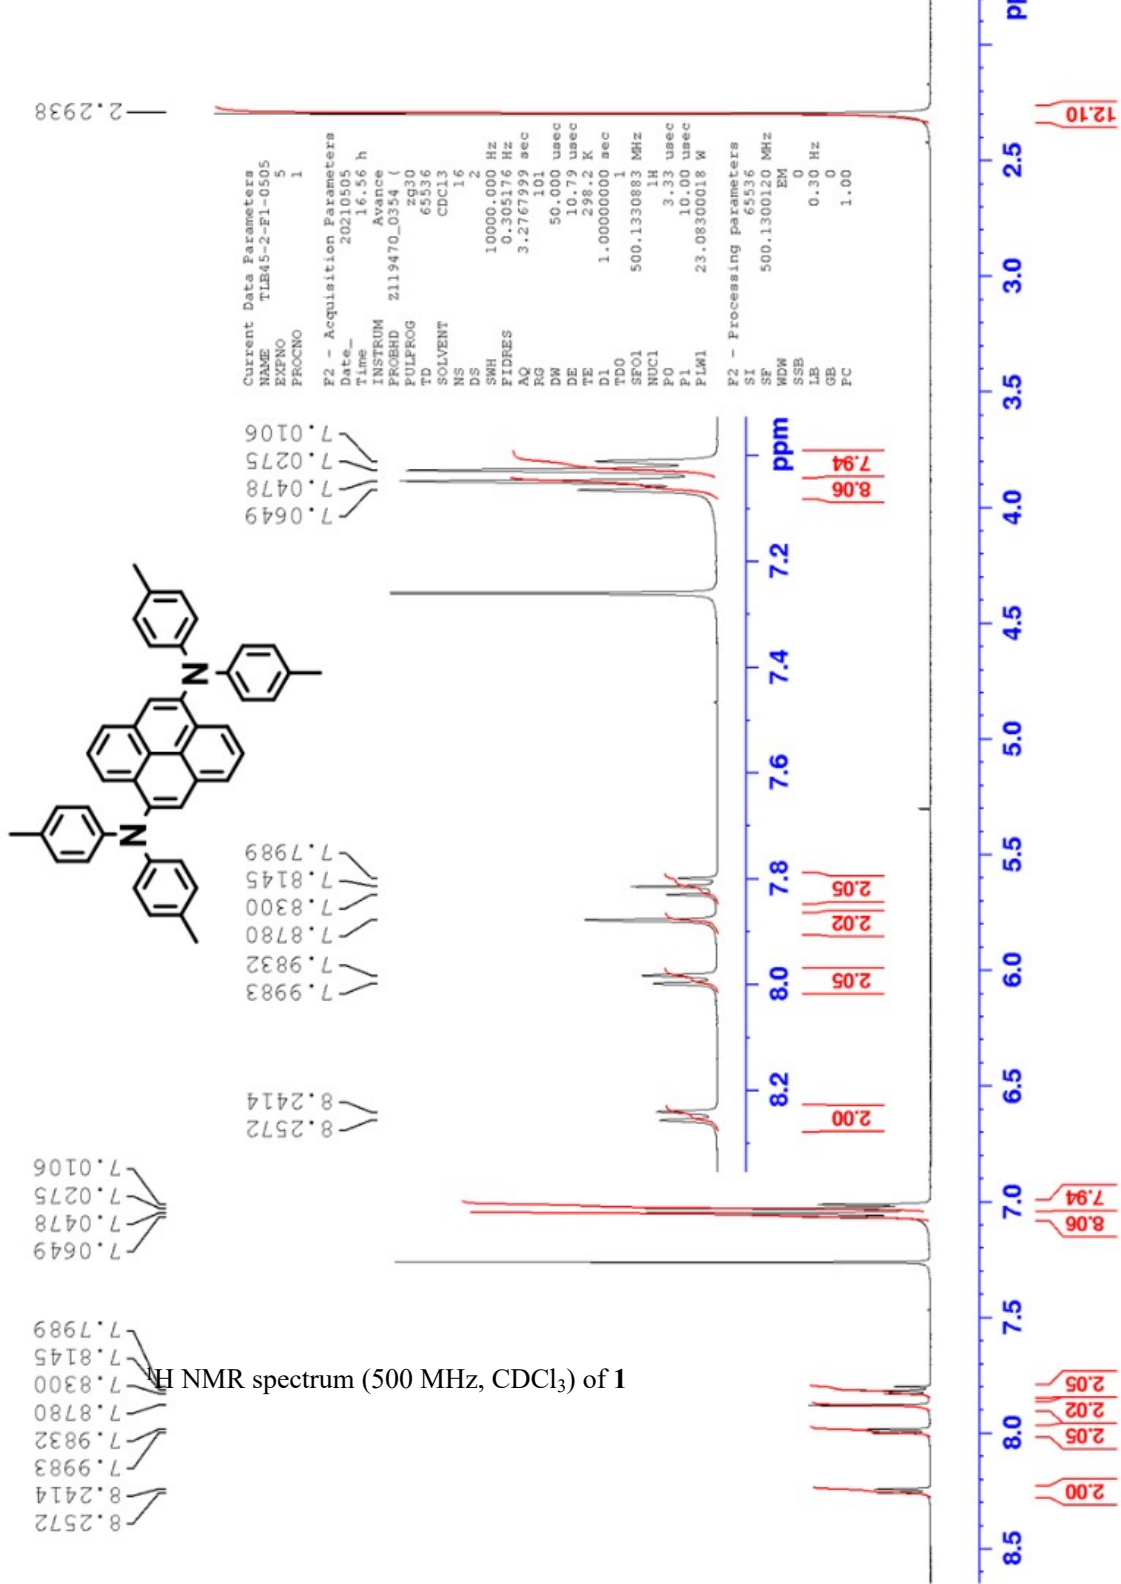

Current Data Parameters  
NAME TLB45-2-F1-0505-C  
EXPNO 1  
PROCNO 1

F2 - Acquisition Parameters  
Date\_ 20210510  
Time 8.00 h  
INSTRUM Avance  
PROBHD z119470\_0354 (zgp30)  
PULPROG zgpg30  
TD 65536  
SOLVENT CDCl3  
NS 9194  
DS 4  
SWH 30120.482 Hz  
FIDRES 0.919204 Hz  
AQ 1.087817 s  
RG 16.500 us  
DE 6.50 us  
TE 295.2 K  
D1 2.00000000 s  
D11 0.03000000 s  
TD0 1  
SFO1 125.7703643 MHz  
NUC1 13C  
P0 3.33 us  
PL1 10.00 us  
PLW1 74.13600159 W  
SFO2 500.1320005 MHz  
NUC2 1H  
waltz65  
PCPD2 80.00 us  
PLW2 23.08300018 W  
PLW12 0.36068001 W  
PLW13 0.18142000 W

F2 - Processing parameters  
SI 32768  
SF 125.7577885 MHz  
WDW EM  
SSB 0  
LB 1.00 Hz  
GB 0  
FC 1.40

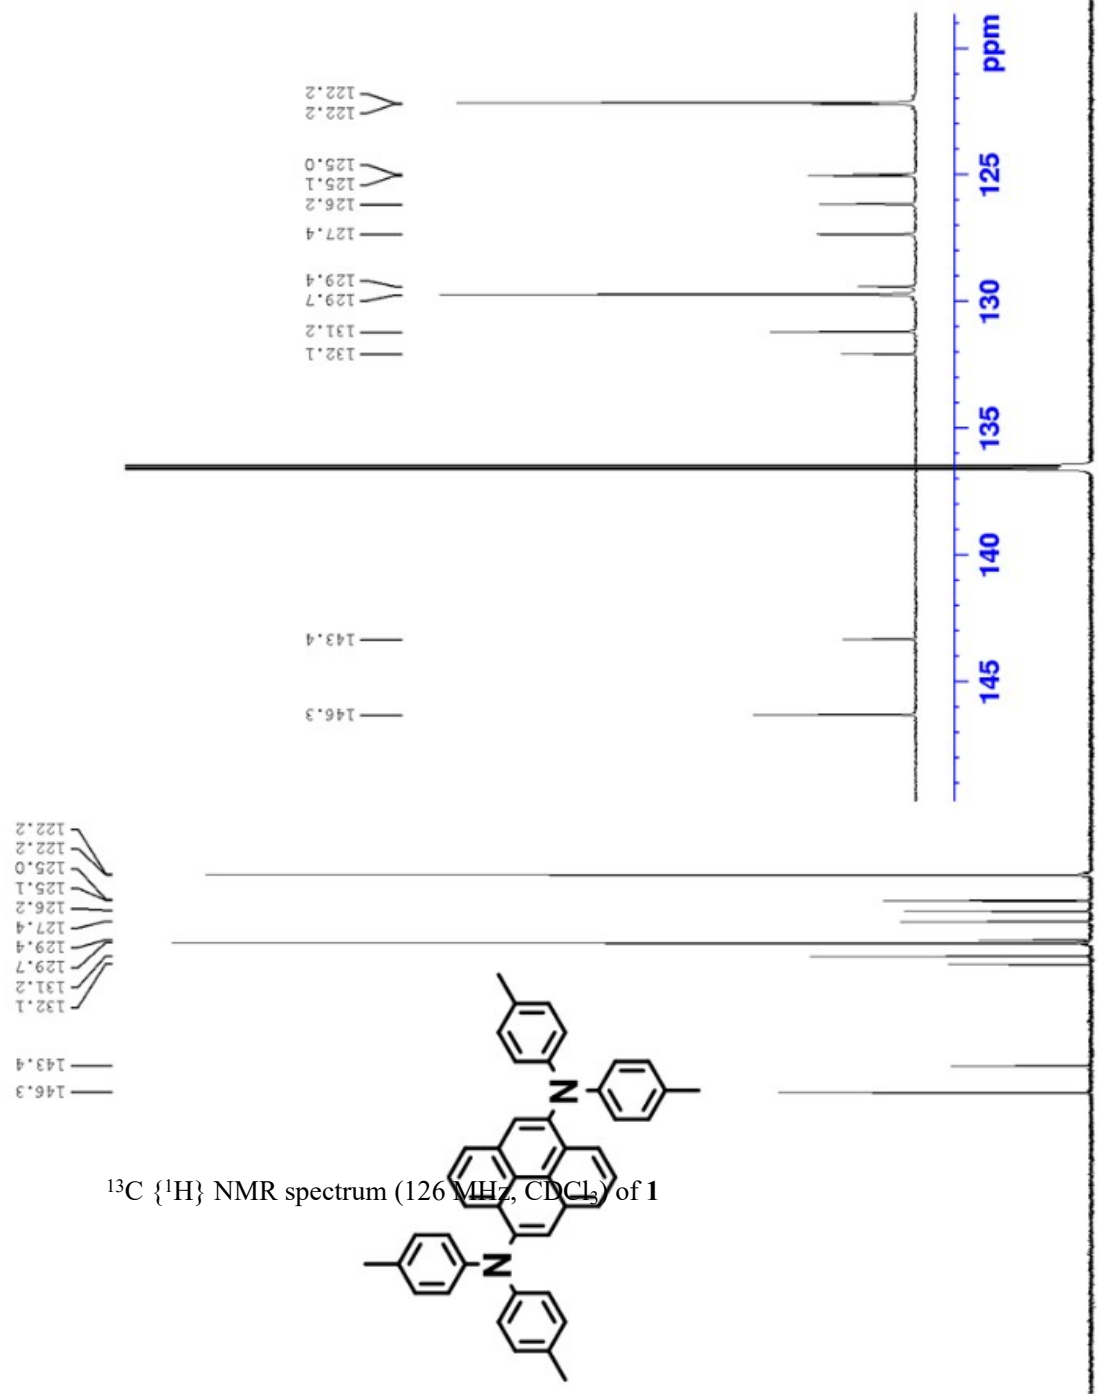

$^{13}\text{C} \{^1\text{H}\}$  NMR spectrum (126 MHz,  $\text{CDCl}_3$ ) of 1

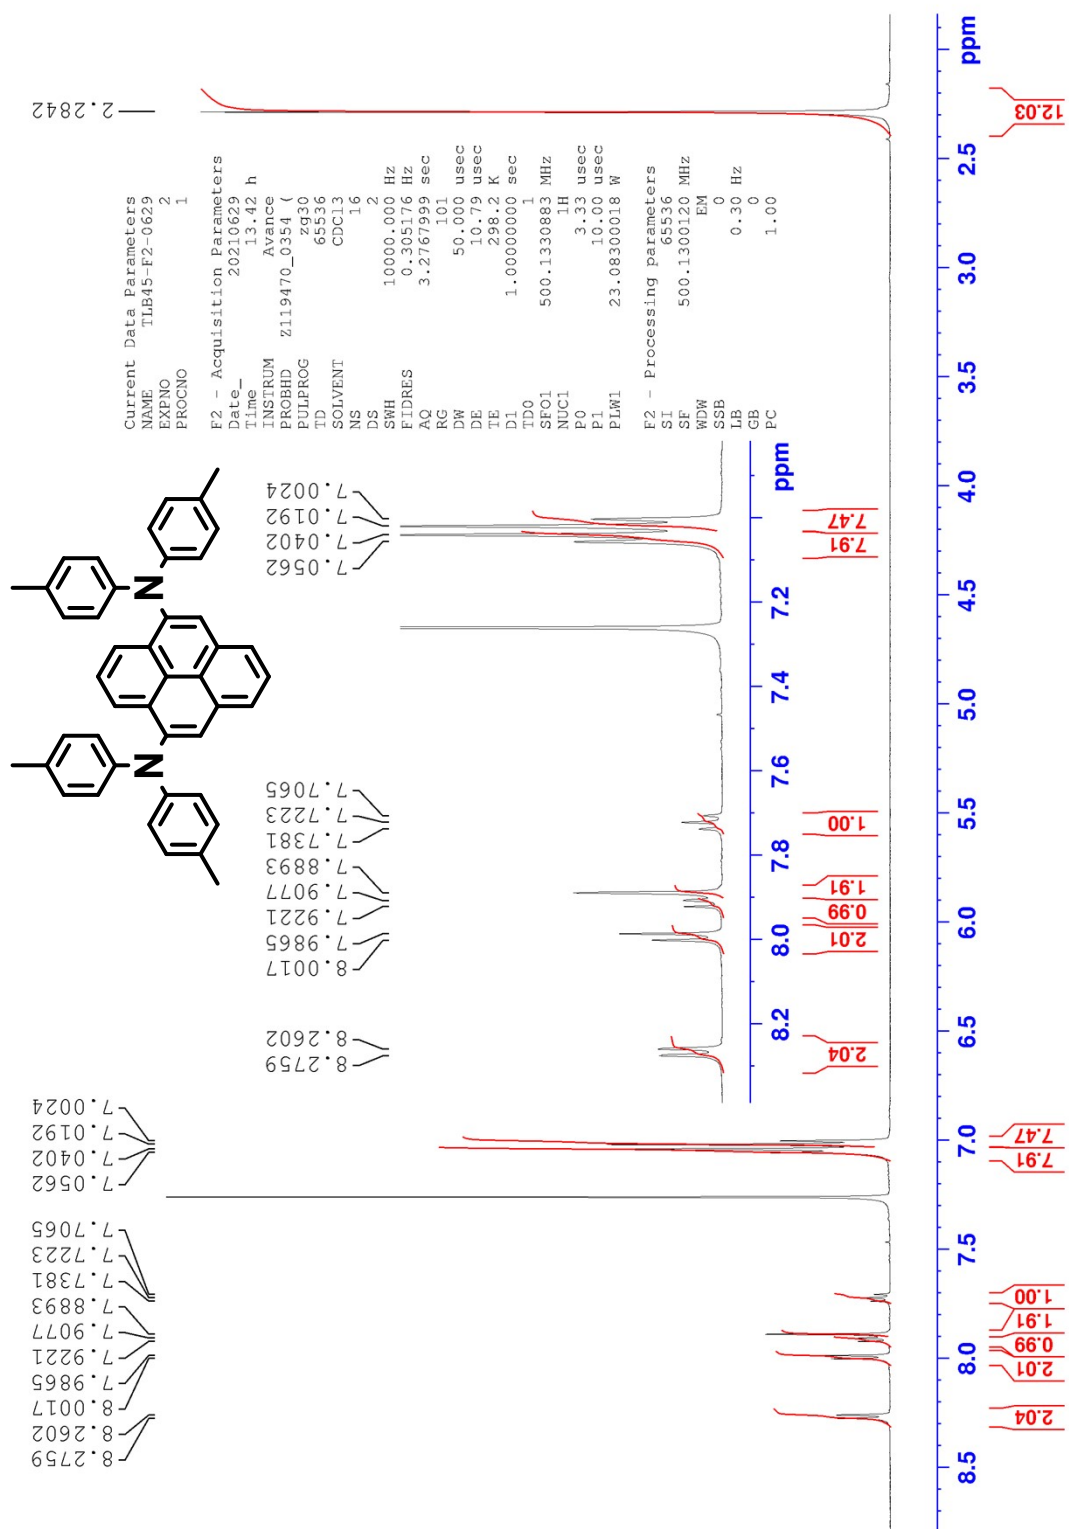

<sup>1</sup>H NMR spectrum (500 MHz, CDCl<sub>3</sub>) of 2



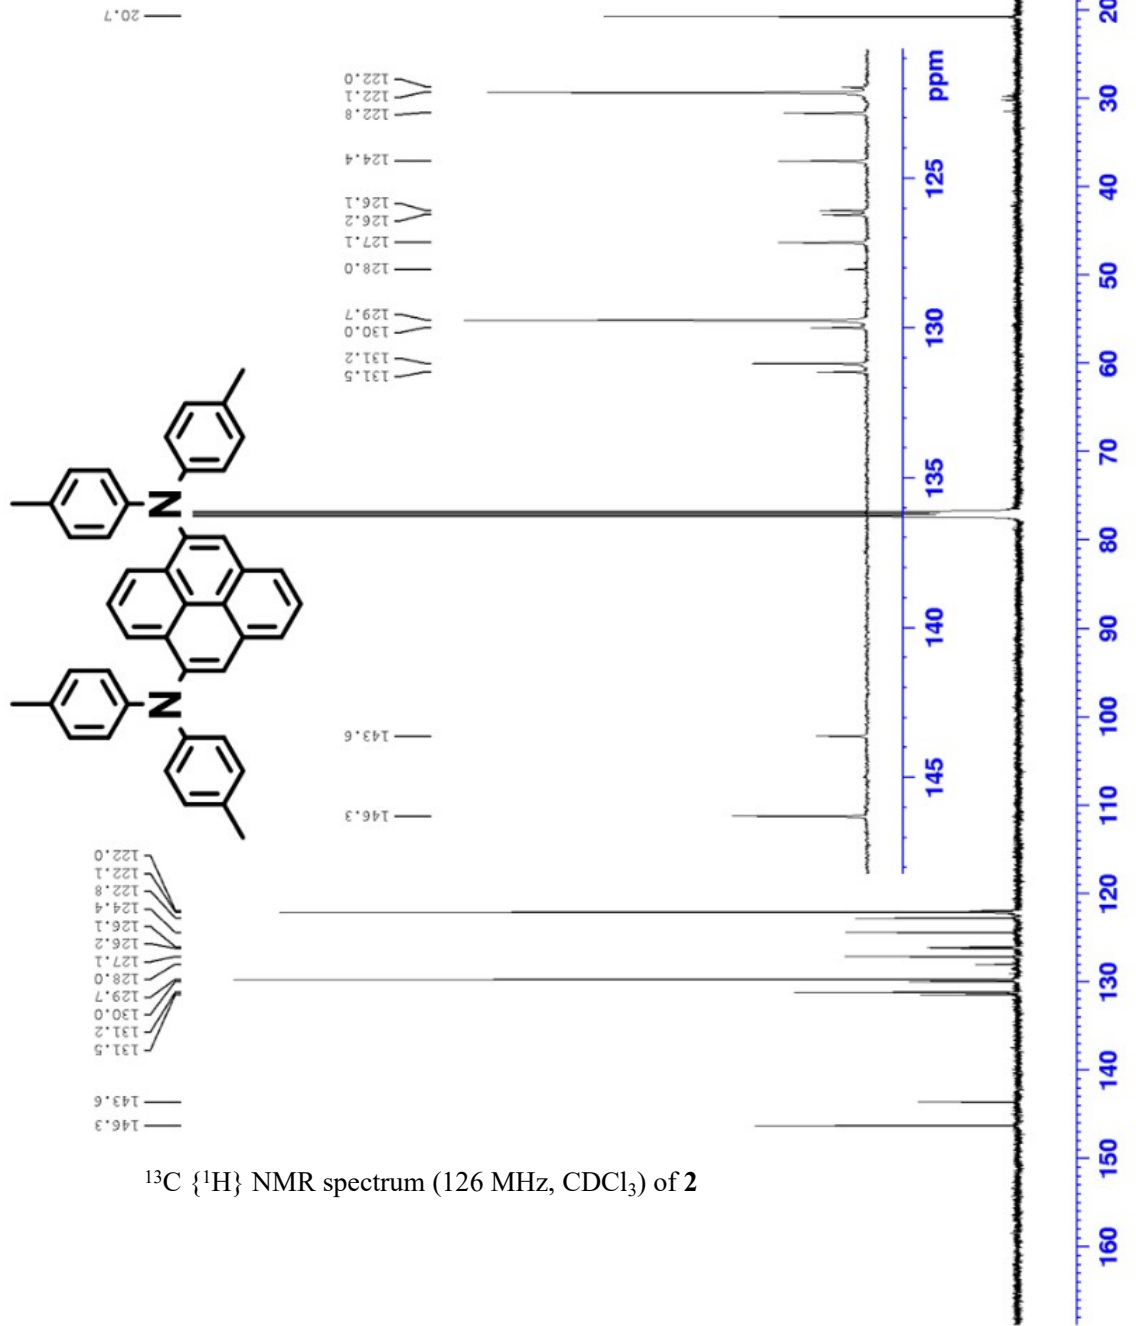

<sup>13</sup>C {<sup>1</sup>H} NMR spectrum (126 MHz, CDCl<sub>3</sub>) of 2

Current Data Parameters  
 NAME TL845-F2-0629-C  
 EXPNO 7  
 PROCNO 1  
 F2 - Acquisition Parameters  
 Date\_ 20180303  
 Time\_ 9.03 h  
 INSTRUM Avance  
 PROBHD 3119470\_0354 (4  
 PULPROG zgpg30  
 TD 65536  
 SOLVENT CDCl3  
 NS 10877  
 DS 4  
 SWH 30120.482 Hz  
 FIDRES 0.263181 Hz  
 AQ 1.0878977 sec  
 RG 101  
 DW 16.600 usec  
 DE 6.50 usec  
 TE 298.2 K  
 D1 2.00000000 sec  
 D11 0.03000000 sec  
 SFO1 125.7703643 MHz  
 SFO2 500.1320005 MHz  
 HPC1 1.33 usec  
 F1 10.00 usec  
 F2 10.00 usec  
 PLM1 74.13600159 M  
 SF02 500.1320005 MHz  
 HWC2 IH  
 CFPDPRG12 waltz65  
 FCFD2 80.00 usec  
 PLM2 23.08200018 W  
 PLM12 0.36068001 W  
 PLM13 0.18142000 W  
 F2 - Processing Parameters  
 SI 32768  
 SF 125.7577885 MHz  
 WDW EM  
 SSB 0  
 LB 1.00 Hz  
 GB 0  
 FC 1.40

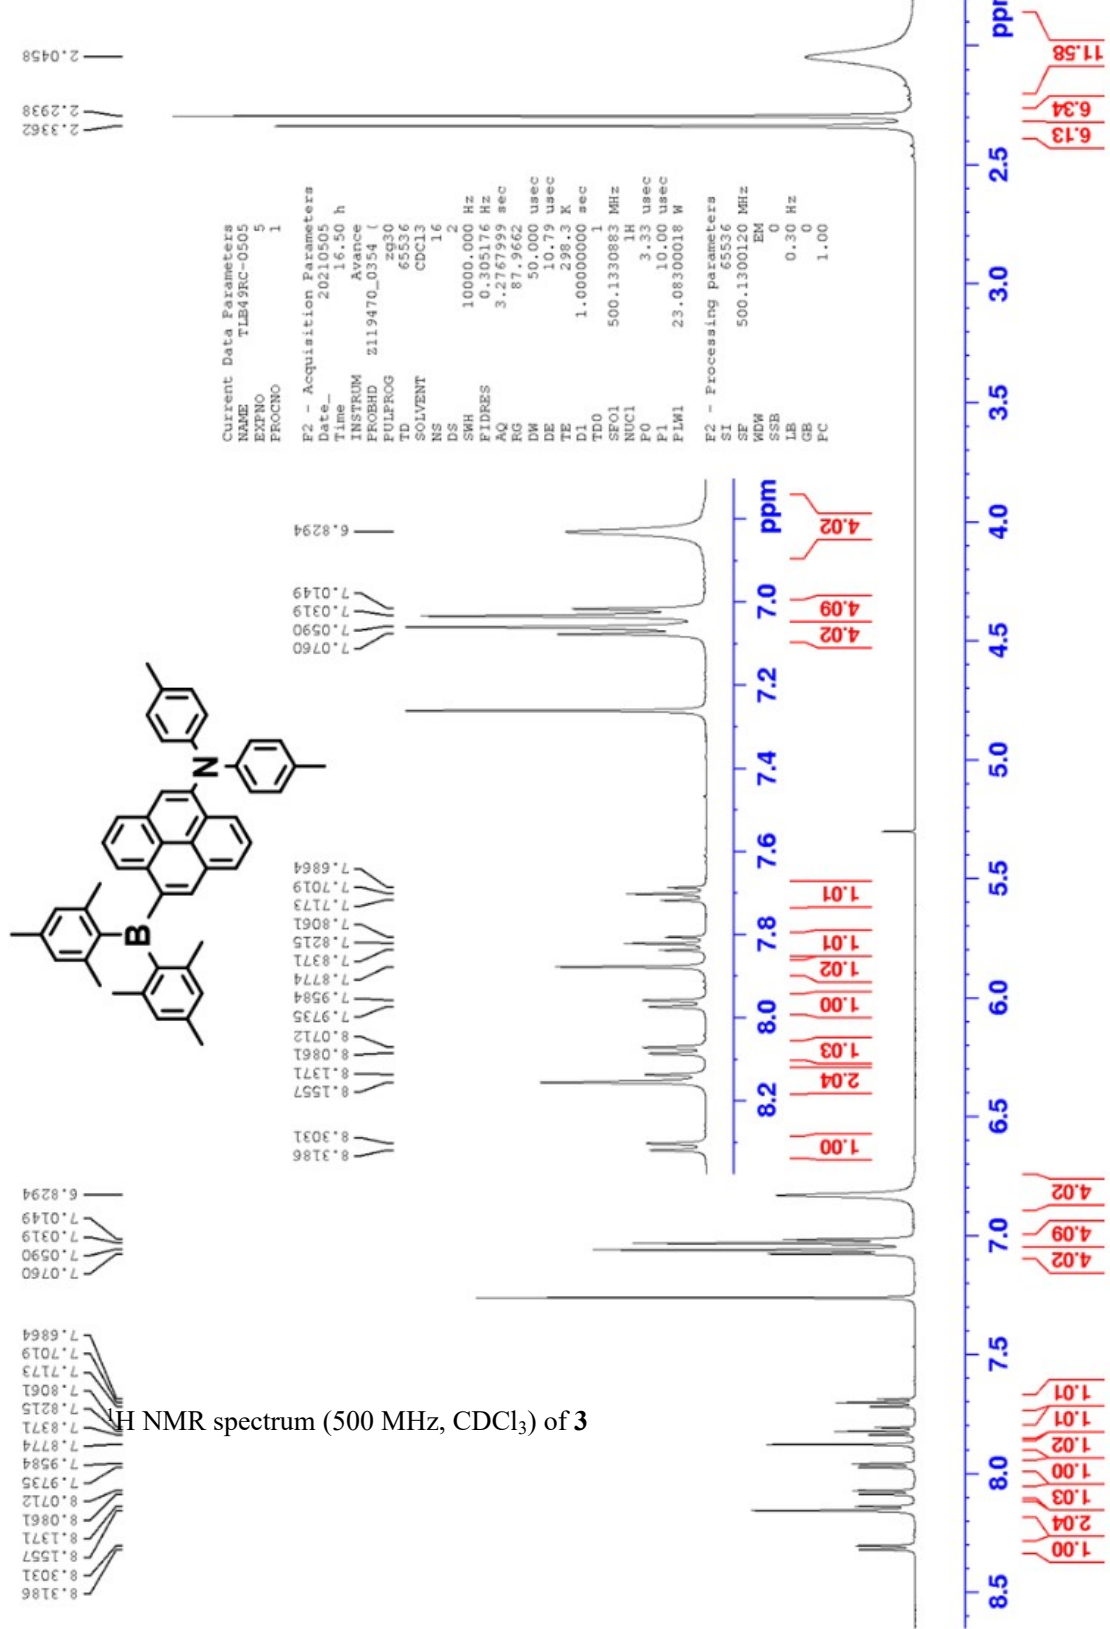

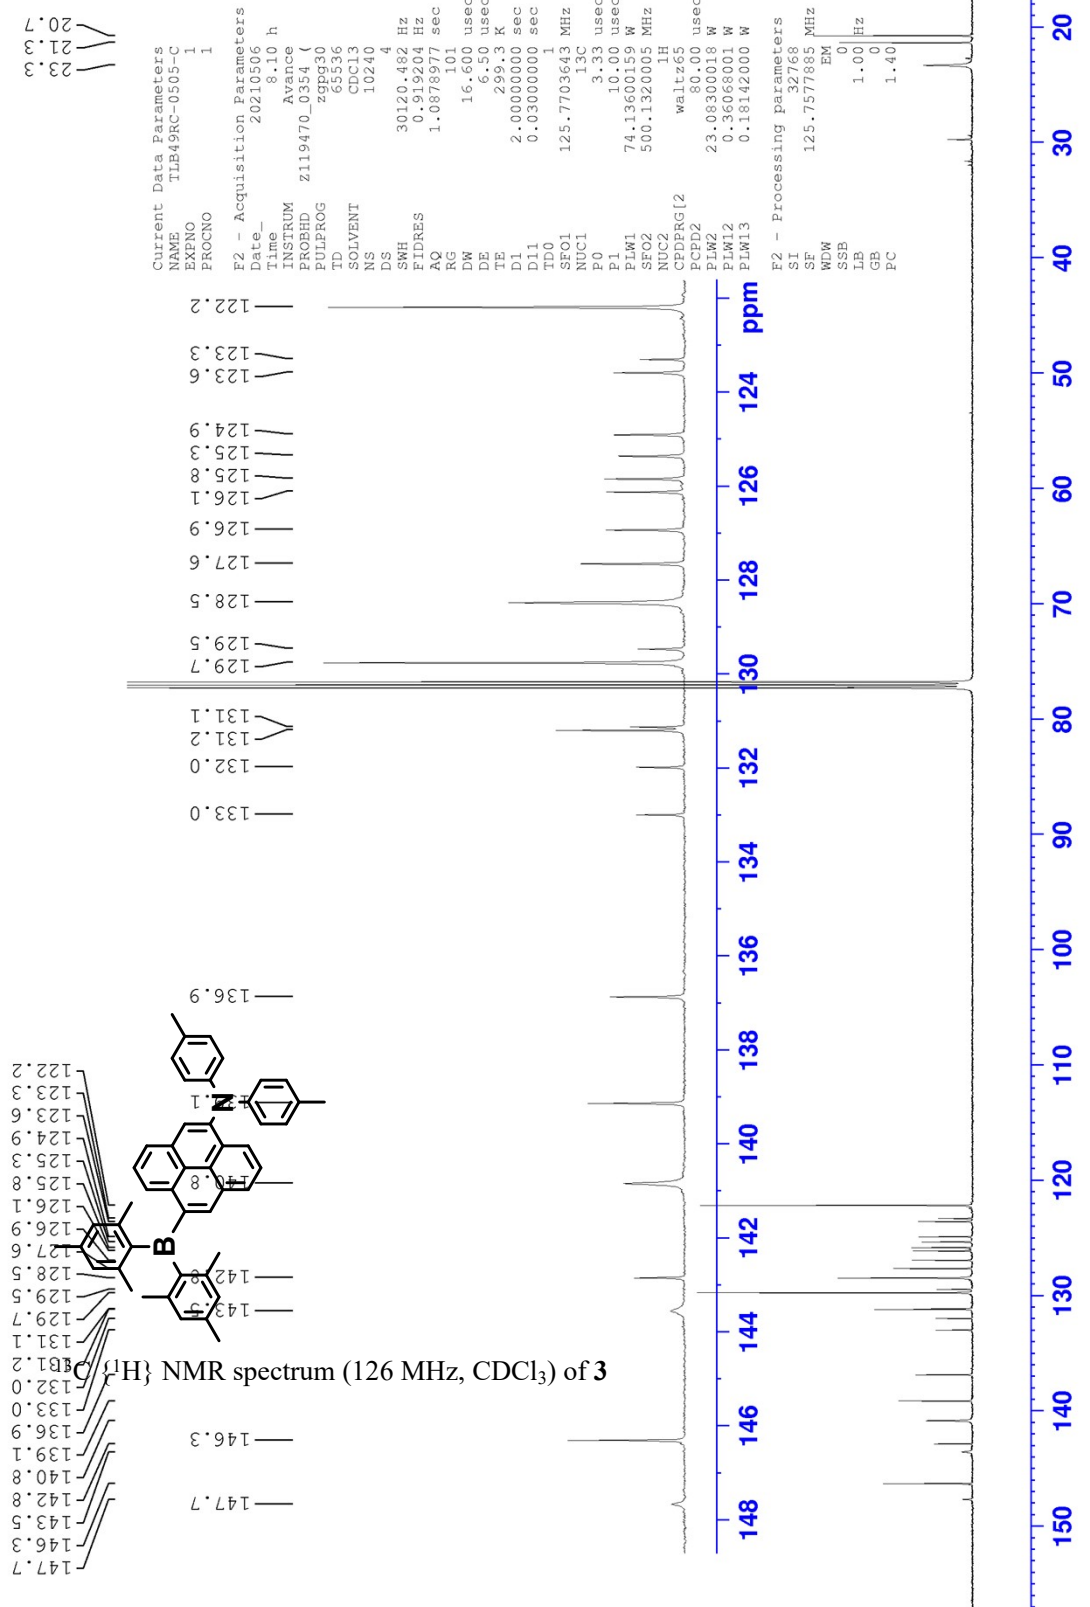

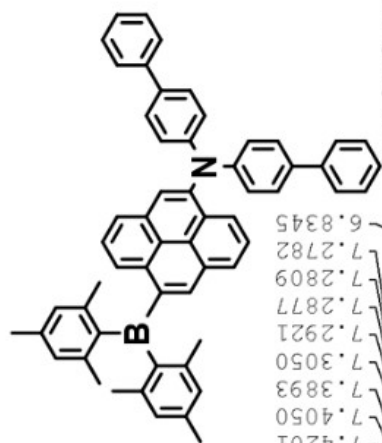

Current Data Parameters  
 NAME TLL54-11C  
 PROCNO 1  
 F2 - Acquisition Parameters  
 Date\_ 20210527  
 Time\_ 20.01 h  
 INSTRUM Avance  
 PROBHD 1119470\_0354 ( Z930  
 PULPROG zg30  
 TD 65536  
 SOLVENT CDCl3  
 NS 16  
 DS 2  
 SWH 10000.000 Hz  
 FIDRES 0.305176 Hz  
 AQ 3.2767999 sec  
 RG 50.001 usec  
 DE 10.079 usec  
 TE 298.1 K  
 D1 1.00000000 sec  
 D11 1  
 SFO1 500.1330883 MHz  
 NUC1 1H  
 P0 3.33 usec  
 F1 10.00 usec  
 PL1 23.08200018 W  
 F2 - Processing parameters  
 SI 65536  
 SF 500.1300122 MHz  
 EM 0  
 WDW EM  
 SSB 0  
 LB 0.30 Hz  
 GB 0  
 DB 0  
 PC 1.00

8.0270  
 8.0192  
 7.8804  
 7.8649  
 7.8493  
 7.758  
 7.7403  
 7.7248  
 7.5716  
 7.5569  
 7.4956  
 7.4783  
 7.4201  
 7.4050  
 7.3893  
 7.3050  
 7.2921  
 7.2877  
 7.2809  
 7.2782  
 6.8345

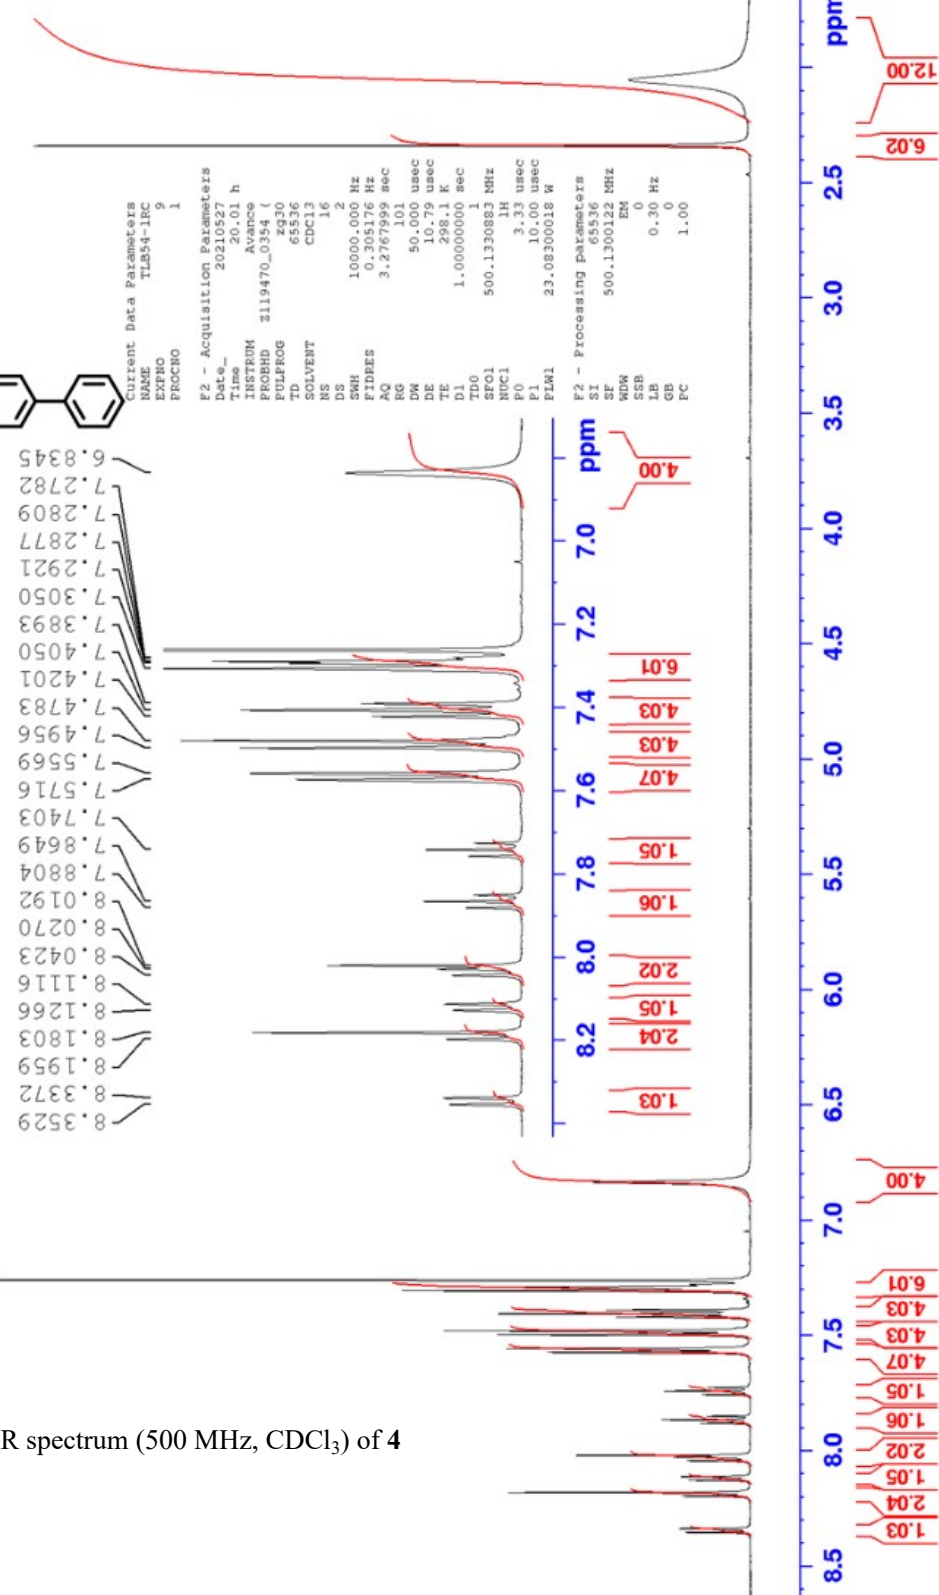

<sup>1</sup>H NMR spectrum (500 MHz, CDCl<sub>3</sub>) of 4

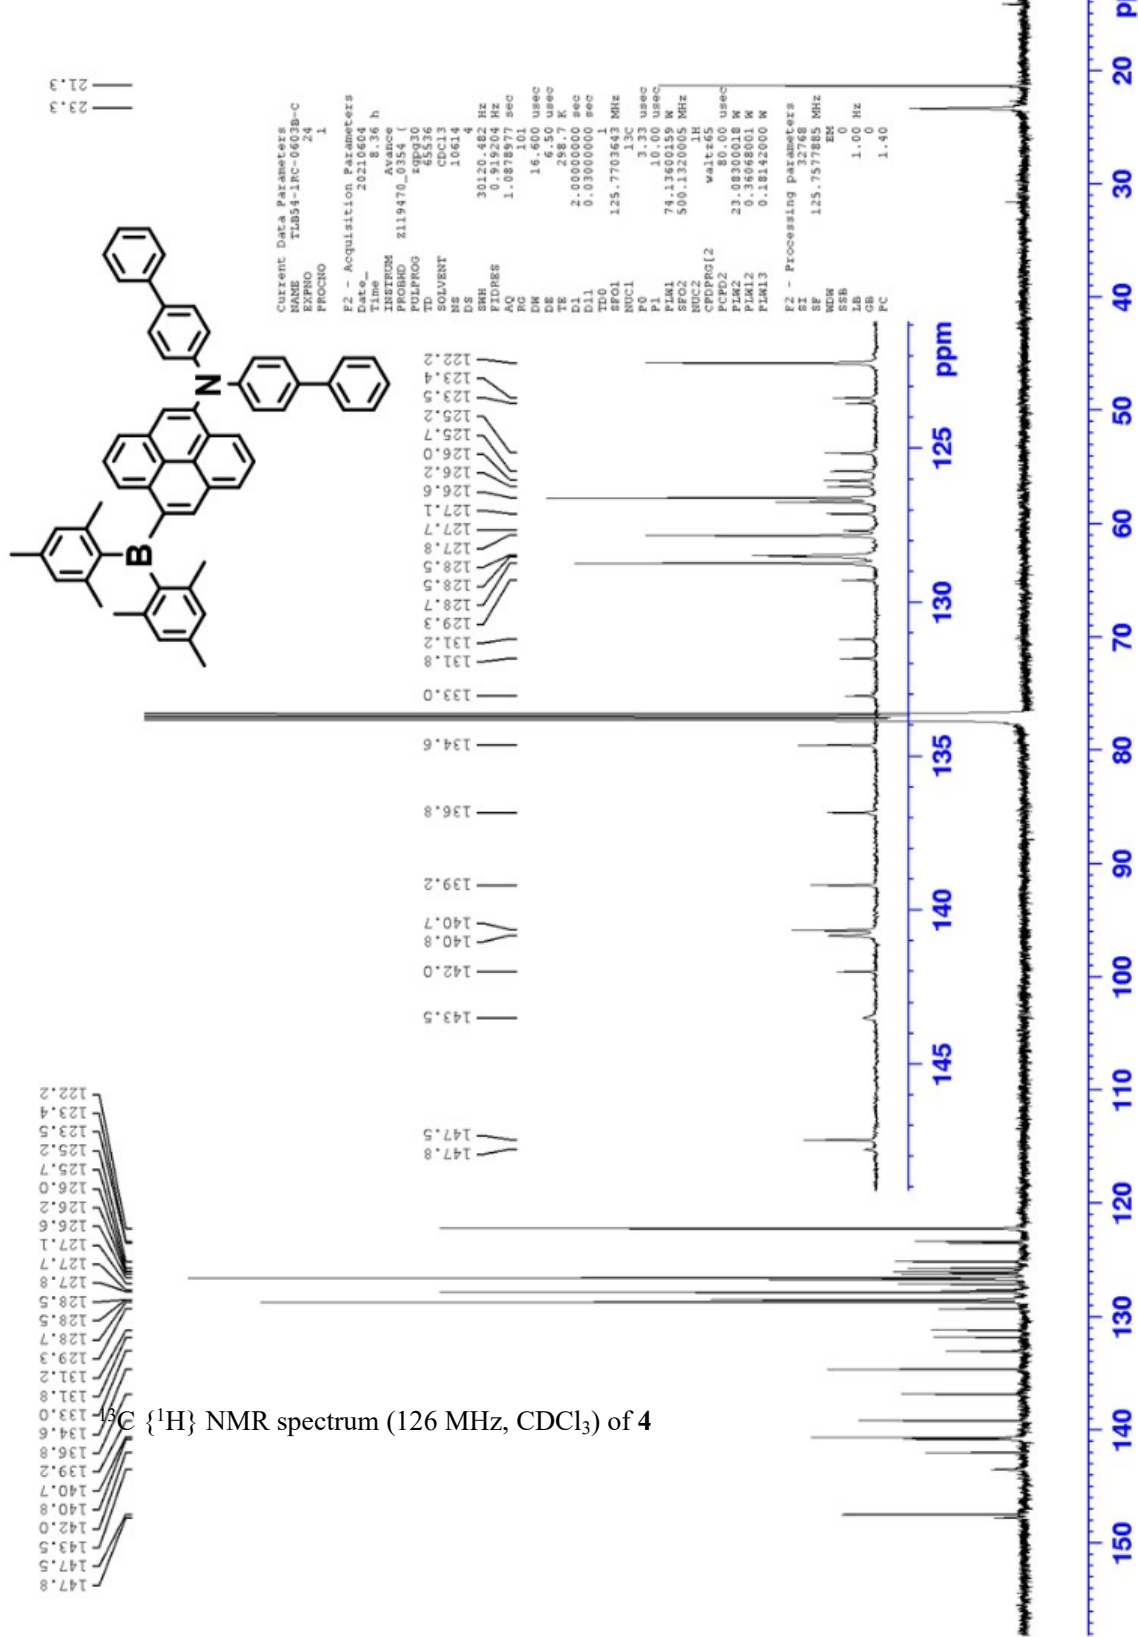



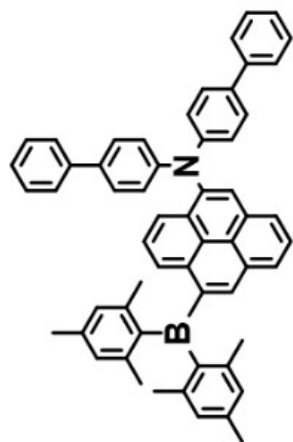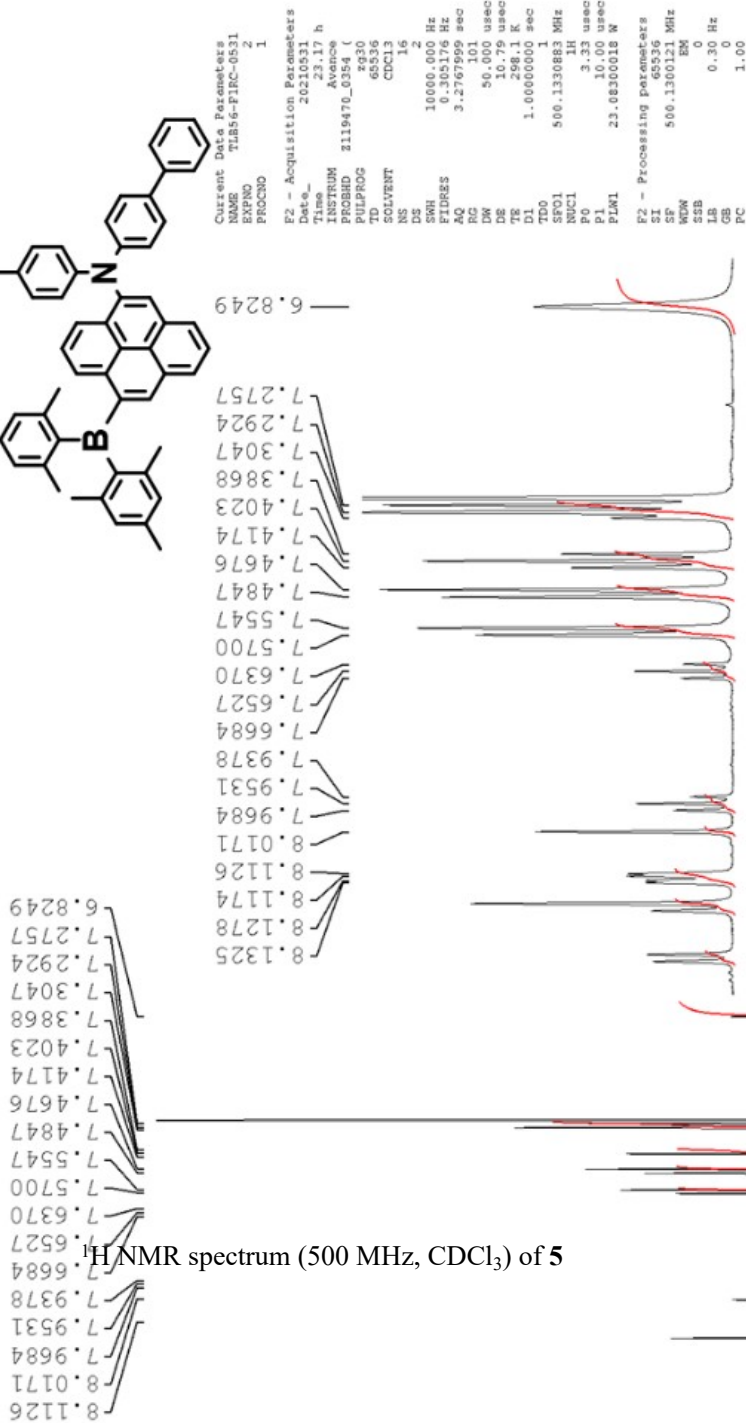

<sup>1</sup>H NMR spectrum (500 MHz, CDCl<sub>3</sub>) of 5

21.3  
23.3

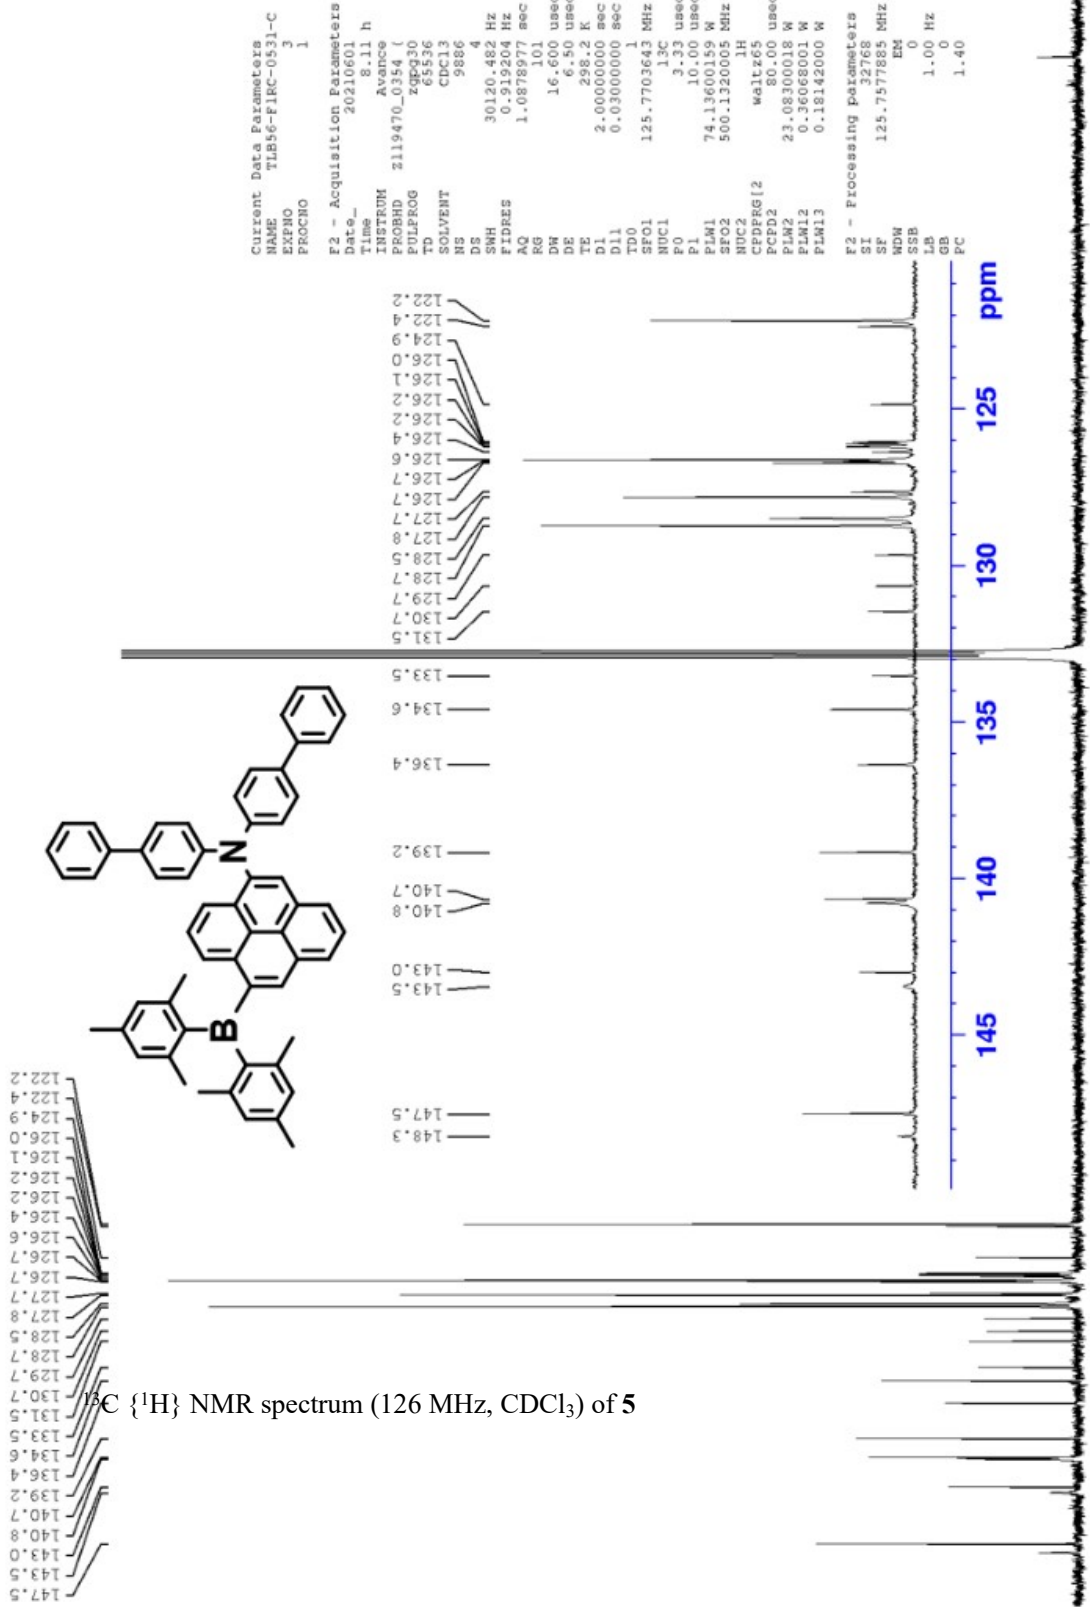

<sup>13</sup>C {<sup>1</sup>H} NMR spectrum (126 MHz, CDCl<sub>3</sub>) of 5

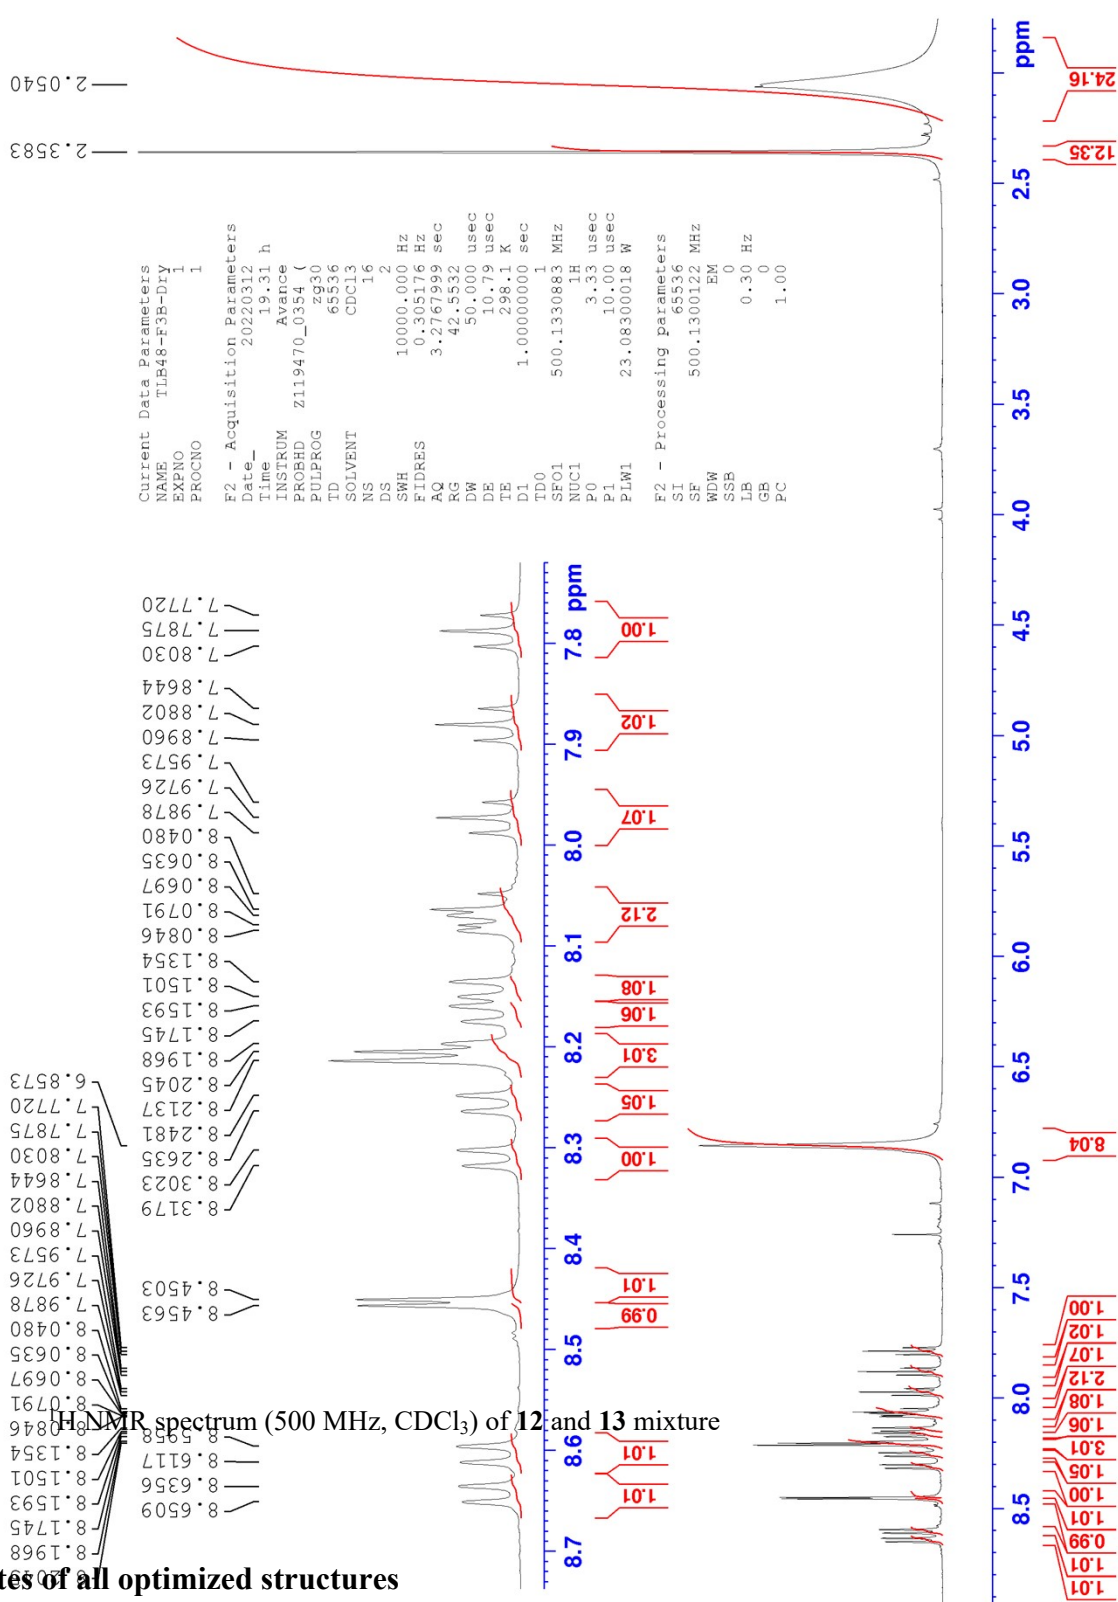

**Cartesian coordinates of all optimized structures**

1  
DFT B3LYP/6-31G(d), gas phase, S<sub>0</sub>  
E(total): -1807.935273 hartree  
Imaginary Freq = 0  
Dipole Moment = 0.028826 Debye

| Symbol | X / Å  | Y / Å   | Z / Å  |
|--------|--------|---------|--------|
| C      | 1.0263 | -2.6644 | 2.059  |
| C      | 1.985  | -1.8733 | 1.4297 |



|   |         |         |         |
|---|---------|---------|---------|
| C | 1.6058  | -0.801  | 0.6105  |
| C | 0.2226  | -0.5358 | 0.4196  |
| C | -0.7438 | -1.3471 | 1.0675  |
| C | -0.3288 | -2.4067 | 1.8862  |
| C | 2.5764  | 0.0525  | -0.0696 |
| C | -0.22   | 0.5374  | -0.4213 |
| C | 0.7464  | 1.3486  | -1.0693 |
| C | 2.1403  | 1.0792  | -0.868  |
| C | 0.3314  | 2.4082  | -1.888  |
| H | 1.084   | 3.0342  | -2.3904 |
| C | -1.0237 | 2.6659  | -2.0608 |
| C | -1.9824 | 1.8749  | -1.4315 |
| C | -1.6032 | 0.8026  | -0.6122 |
| C | -2.5738 | -0.0509 | 0.068   |
| C | -2.1377 | -1.0777 | 0.8663  |
| H | -2.855  | -1.7279 | 1.3952  |
| H | 1.3475  | -3.5003 | 2.6989  |
| H | 3.051   | -2.1022 | 1.5886  |
| H | -1.0814 | -3.0327 | 2.3886  |
| H | 2.8576  | 1.7295  | -1.3968 |
| H | -1.3449 | 3.5017  | -2.7008 |
| H | -3.0484 | 2.1038  | -1.5904 |
| N | 3.9669  | -0.2329 | 0.088   |
| C | 4.7628  | -0.2067 | -1.0885 |
| C | 6.0007  | 0.4682  | -1.1451 |
| C | 4.332   | -0.919  | -2.2318 |
| C | 6.7793  | 0.4163  | -2.2962 |
| H | 6.3628  | 1.0371  | -0.2741 |
| C | 5.1201  | -0.9541 | -3.375  |
| H | 3.3658  | -1.4473 | -2.2208 |
| C | 6.3525  | -0.2926 | -3.4229 |
| H | 7.7432  | 0.9476  | -2.319  |
| H | 4.7686  | -1.5137 | -4.2555 |
| C | 4.5693  | 0.104   | 1.329   |
| C | 5.7689  | -0.5337 | 1.7211  |
| C | 3.9728  | 1.0209  | 2.221   |
| C | 6.3346  | -0.2629 | 2.9606  |
| H | 6.2612  | -1.2462 | 1.0408  |
| C | 4.5497  | 1.2735  | 3.4609  |
| H | 3.0392  | 1.5358  | 1.9442  |
| C | 5.734   | 0.6385  | 3.8467  |
| H | 7.269   | -0.7685 | 3.2492  |
| H | 4.0664  | 1.9883  | 4.1445  |
| C | 7.1921  | -0.354  | -4.6403 |

|   |         |         |         |
|---|---------|---------|---------|
| H | 7.8485  | -1.2603 | -4.6065 |
| H | 6.559   | -0.4162 | -5.5596 |
| H | 7.8469  | 0.5483  | -4.7224 |
| C | 6.3353  | 0.9038  | 5.1729  |
| H | 5.9418  | 0.1727  | 5.9239  |
| H | 7.4478  | 0.801   | 5.1358  |
| H | 6.0871  | 1.9348  | 5.5266  |
| N | -3.9643 | 0.2346  | -0.0893 |
| C | -4.7602 | 0.2082  | 1.0872  |
| C | -5.9987 | -0.4656 | 1.1432  |
| C | -4.3287 | 0.9193  | 2.231   |
| C | -6.7772 | -0.4139 | 2.2944  |
| H | -6.3613 | -1.0334 | 0.2718  |
| C | -5.1168 | 0.9542  | 3.3743  |
| H | -3.3621 | 1.4468  | 2.2203  |
| C | -6.3497 | 0.2937  | 3.4217  |
| H | -7.7416 | -0.9443 | 2.3168  |
| H | -4.7648 | 1.5128  | 4.2552  |
| C | -4.5669 | -0.1008 | -1.3305 |
| C | -5.7661 | 0.5382  | -1.7221 |
| C | -3.9702 | -1.0159 | -2.2242 |
| C | -6.3319 | 0.2691  | -2.9618 |
| H | -6.2574 | 1.251   | -1.0414 |
| C | -4.5472 | -1.2667 | -3.4645 |
| H | -3.0357 | -1.5301 | -1.9489 |
| C | -5.7323 | -0.6326 | -3.8486 |
| H | -7.2645 | 0.7774  | -3.2512 |
| H | -4.062  | -1.9783 | -4.1502 |
| C | -7.1893 | 0.3549  | 4.6391  |
| H | -7.845  | 1.2617  | 4.606   |
| H | -7.8447 | -0.5469 | 4.7206  |
| H | -6.5561 | 0.416   | 5.5584  |
| C | -6.3517 | -0.9182 | -5.1622 |
| H | -7.1125 | -1.7327 | -5.0575 |
| H | -6.8653 | -0.0114 | -5.5668 |
| H | -5.5845 | -1.2504 | -5.9043 |

2

DFT B3LYP/6-31G(d), gas phase, S<sub>0</sub>

E(total): -1807.935286 hartree

Imaginary Freq = 0

Dipole Moment = 0.114157 Debye

| Symbol | X / Å | Y / Å | Z / Å |
|--------|-------|-------|-------|
|--------|-------|-------|-------|

|   |          |          |          |
|---|----------|----------|----------|
| C | -0.00014 | -3.1417  | 3.5814   |
| C | 1.21031  | -2.69753 | 3.05276  |
| C | 1.23385  | -1.79205 | 1.97821  |
| C | -0.00005 | -1.32799 | 1.43342  |
| C | -1.234   | -1.79202 | 1.97813  |
| C | -1.21055 | -2.6975  | 3.05268  |
| C | 2.45883  | -1.29867 | 1.42547  |
| C | 0        | -0.41665 | 0.33482  |
| C | 1.23859  | 0.0242   | -0.23353 |
| C | 2.48035  | -0.42729 | 0.37211  |
| C | 1.2115   | 0.84399  | -1.3719  |
| H | 2.14479  | 1.16439  | -1.8194  |
| C | 0.0001   | 1.23834  | -1.93313 |
| C | -1.21135 | 0.84401  | -1.37199 |
| C | -1.23855 | 0.02423  | -0.23361 |
| C | -2.48037 | -0.42723 | 0.37195  |
| C | -2.45893 | -1.29861 | 1.4253   |
| H | -3.39809 | -1.63351 | 1.85666  |
| H | 3.39796  | -1.6336  | 1.85688  |
| H | -0.00018 | -3.8425  | 4.41199  |
| H | 2.15101  | -3.04948 | 3.46873  |
| H | -2.15129 | -3.04942 | 3.46859  |
| H | 0.00014  | 1.86307  | -2.82217 |
| H | -2.1446  | 1.16442  | -1.81957 |
| N | 3.7275   | 0.01794  | -0.16479 |
| N | -3.72746 | 0.01803  | -0.16505 |
| C | -4.70768 | -0.96045 | -0.49703 |
| C | -6.03626 | -0.85198 | -0.06252 |
| C | -4.34506 | -2.0755  | -1.26967 |
| C | -6.97203 | -1.82692 | -0.40674 |
| H | -6.33479 | -0.0047  | 0.54639  |
| C | -5.28564 | -3.04938 | -1.58891 |
| H | -3.31976 | -2.17353 | -1.61337 |
| C | -6.62095 | -2.9442  | -1.17288 |
| H | -7.99621 | -1.72068 | -0.05522 |
| H | -4.97708 | -3.90504 | -2.18602 |
| C | -4.08325 | 1.38896  | -0.05492 |
| C | -4.94217 | 1.98079  | -0.999   |
| C | -3.56237 | 2.19435  | 0.96682  |
| C | -5.27127 | 3.32835  | -0.90588 |
| H | -5.34612 | 1.37759  | -1.80604 |
| C | -3.88804 | 3.54929  | 1.03428  |
| H | -2.89916 | 1.76005  | 1.70767  |
| C | -4.75145 | 4.14513  | 0.11008  |

|   |          |          |          |
|---|----------|----------|----------|
| H | -5.93687 | 3.75986  | -1.65092 |
| H | -3.46441 | 4.15147  | 1.83519  |
| C | 4.70758  | -0.96058 | -0.49707 |
| C | 6.03622  | -0.85233 | -0.06251 |
| C | 4.34486  | -2.07544 | -1.26985 |
| C | 6.97186  | -1.82728 | -0.40686 |
| H | 6.33479  | -0.00522 | 0.54661  |
| C | 5.28538  | -3.04939 | -1.58924 |
| H | 3.31953  | -2.17336 | -1.61351 |
| C | 6.62066  | -2.9444  | -1.17326 |
| H | 7.99604  | -1.72124 | -0.05524 |
| H | 4.97672  | -3.90496 | -2.18643 |
| C | 4.08335  | 1.38882  | -0.05462 |
| C | 4.94245  | 1.98062  | -0.99856 |
| C | 3.56236  | 2.19425  | 0.96705  |
| C | 5.27161  | 3.32817  | -0.90537 |
| H | 5.34647  | 1.37742  | -1.80557 |
| C | 3.8881   | 3.54916  | 1.03458  |
| H | 2.89901  | 1.75998  | 1.70778  |
| C | 4.7517   | 4.14496  | 0.11052  |
| H | 5.93735  | 3.75965  | -1.65032 |
| H | 3.46437  | 4.15135  | 1.83542  |
| C | 7.64338  | -3.98723 | -1.55945 |
| H | 7.22192  | -4.9982  | -1.5203  |
| H | 8.011    | -3.8315  | -2.58293 |
| H | 8.51302  | -3.95982 | -0.89435 |
| C | 5.12628  | 5.60554  | 0.20468  |
| H | 6.15307  | 5.73639  | 0.5722   |
| H | 5.07116  | 6.09951  | -0.77283 |
| H | 4.46295  | 6.1442   | 0.88922  |
| C | -5.1259  | 5.60575  | 0.20409  |
| H | -5.06926 | 6.09998  | -0.77321 |
| H | -6.15319 | 5.73669  | 0.57014  |
| H | -4.46345 | 6.1441   | 0.88973  |
| C | -7.64352 | -3.98736 | -1.55859 |
| H | -7.22512 | -4.99915 | -1.50825 |
| H | -8.51801 | -3.95239 | -0.90029 |
| H | -8.00286 | -3.83886 | -2.58606 |

### 3

DFT B3LYP/6-31G(d), gas phase,  $S_0$

E(total): -1935.314857 hartree

Imaginary Freq = 0

Dipole Moment = 0.298436 Debye

| Symbol | X / Å   | Y / Å   | Z / Å   |
|--------|---------|---------|---------|
| C      | 1.5689  | 1.2105  | -3.1287 |
| C      | 2.5032  | 0.7759  | -2.1907 |
| C      | 2.0934  | 0.2793  | -0.9457 |
| C      | 0.7036  | 0.2132  | -0.6557 |
| C      | -0.2383 | 0.662   | -1.6177 |
| C      | 0.208   | 1.1598  | -2.8492 |
| C      | 3.0357  | -0.1862 | 0.0686  |
| C      | 0.23    | -0.3025 | 0.5949  |
| C      | 1.1682  | -0.7492 | 1.5598  |
| C      | 2.5693  | -0.6711 | 1.2643  |
| C      | 0.7161  | -1.2521 | 2.7875  |
| H      | 1.4449  | -1.5996 | 3.5349  |
| C      | -0.6473 | -1.3119 | 3.0571  |
| C      | -1.5756 | -0.8773 | 2.1151  |
| C      | -1.163  | -0.3724 | 0.874   |
| C      | -2.1008 | 0.0913  | -0.1235 |
| C      | -1.6381 | 0.5981  | -1.3024 |
| H      | -2.3446 | 0.976   | -2.0617 |
| H      | 1.9148  | 1.5984  | -4.0988 |
| H      | 3.5745  | 0.8321  | -2.442  |
| H      | -0.5245 | 1.5102  | -3.5917 |
| H      | 3.2659  | -1.0341 | 2.0388  |
| H      | -0.9968 | -1.7094 | 4.022   |
| H      | -2.6523 | -0.9445 | 2.3416  |
| B      | -3.6389 | 0.0349  | 0.0825  |
| N      | 4.432   | -0.1569 | -0.2315 |
| C      | 5.1829  | -1.3154 | 0.1027  |
| C      | 6.4188  | -1.2423 | 0.7797  |
| C      | 4.7078  | -2.5868 | -0.2949 |
| C      | 7.1531  | -2.3961 | 1.0319  |
| H      | 6.8144  | -0.2685 | 1.1088  |
| C      | 5.4519  | -3.7289 | -0.0284 |
| H      | 3.7416  | -2.6762 | -0.8157 |
| C      | 6.6828  | -3.6506 | 0.633   |
| H      | 8.1163  | -2.317  | 1.559   |
| H      | 5.0663  | -4.7101 | -0.3453 |
| C      | 5.0797  | 1.1064  | -0.2207 |
| C      | 6.2964  | 1.2763  | -0.9212 |
| C      | 4.512   | 2.2277  | 0.4218  |
| C      | 6.9072  | 2.5226  | -0.9743 |
| H      | 6.7654  | 0.4171  | -1.4258 |
| C      | 5.1342  | 3.4694  | 0.351   |

|   |         |         |         |
|---|---------|---------|---------|
| H | 3.5647  | 2.1286  | 0.9751  |
| C | 6.3368  | 3.6337  | -0.3426 |
| H | 7.853   | 2.6369  | -1.526  |
| H | 4.6713  | 4.3332  | 0.8525  |
| C | -4.3534 | -1.2638 | 0.537   |
| C | -5.1409 | -1.296  | 1.704   |
| C | -4.2284 | -2.4381 | -0.2274 |
| C | -5.7703 | -2.4821 | 2.0952  |
| C | -4.8719 | -3.6146 | 0.1742  |
| C | -5.6415 | -3.6485 | 1.3374  |
| H | -6.3812 | -2.4973 | 3.0109  |
| H | -4.7656 | -4.5233 | -0.4378 |
| C | -4.4335 | 1.3229  | -0.2636 |
| C | -5.259  | 1.3779  | -1.4007 |
| C | -4.3066 | 2.4674  | 0.5428  |
| C | -5.9515 | 2.5534  | -1.7081 |
| C | -5.0082 | 3.6349  | 0.2238  |
| C | -5.836  | 3.6866  | -0.8992 |
| H | -6.5966 | 2.5868  | -2.5993 |
| H | -4.9007 | 4.5223  | 0.8659  |
| C | 7.0033  | 4.9541  | -0.3973 |
| H | 7.5608  | 5.0809  | -1.3579 |
| H | 6.2587  | 5.7832  | -0.3087 |
| H | 7.7339  | 5.049   | 0.4456  |
| C | 7.4753  | -4.8733 | 0.8933  |
| H | 8.1214  | -5.1055 | 0.009   |
| H | 8.1374  | -4.741  | 1.7842  |
| H | 6.8071  | -5.7507 | 1.0766  |
| C | -6.5896 | 4.9198  | -1.2233 |
| H | -6.7185 | 5.0307  | -2.3282 |
| H | -7.6057 | 4.8792  | -0.7553 |
| H | -6.0622 | 5.8259  | -0.8359 |
| C | -5.3946 | 0.216   | -2.3127 |
| H | -4.5079 | 0.1608  | -2.9948 |
| H | -5.4523 | -0.7417 | -1.7349 |
| H | -6.3137 | 0.3024  | -2.9428 |
| C | -3.4444 | 2.4785  | 1.7511  |
| H | -4.0752 | 2.5592  | 2.6723  |
| H | -2.8297 | 1.5453  | 1.827   |
| H | -2.7502 | 3.3551  | 1.7241  |
| C | -6.3028 | -4.9012 | 1.7695  |
| H | -7.2693 | -4.6843 | 2.2876  |
| H | -6.5109 | -5.5675 | 0.8965  |
| H | -5.6404 | -5.4549 | 2.4823  |

|   |         |         |         |
|---|---------|---------|---------|
| C | -5.3237 | -0.0944 | 2.5548  |
| H | -4.3727 | 0.1577  | 3.0897  |
| H | -5.6152 | 0.7883  | 1.9303  |
| H | -6.1194 | -0.2593 | 3.3225  |
| C | -3.4287 | -2.4896 | -1.4773 |
| H | -2.4871 | -3.0689 | -1.3023 |
| H | -4.007  | -2.9984 | -2.2885 |
| H | -3.1499 | -1.4668 | -1.8345 |

#### 4

DFT B3LYP/6-31G(d), gas phase,  $S_0$

E(total): -2318.794595 hartree

Imaginary Freq = 0

Dipole Moment = 0.796406 Debye

| Symbol | X / Å   | Y / Å   | Z / Å   |
|--------|---------|---------|---------|
| C      | -1.884  | -3.0484 | 1.3034  |
| C      | -0.5258 | -2.7483 | 1.2873  |
| C      | -0.0838 | -1.5205 | 0.7759  |
| C      | -1.0264 | -0.5866 | 0.2761  |
| C      | -2.4144 | -0.8965 | 0.3018  |
| C      | -2.8168 | -2.1369 | 0.8165  |
| C      | 1.3124  | -1.1938 | 0.743   |
| C      | -0.5629 | 0.6642  | -0.2483 |
| C      | 0.8215  | 0.9851  | -0.2709 |
| C      | 1.7682  | 0.0027  | 0.2502  |
| C      | 1.2213  | 2.2282  | -0.78   |
| H      | 2.2879  | 2.5029  | -0.8041 |
| C      | 0.2826  | 3.135   | -1.268  |
| C      | -1.0728 | 2.8255  | -1.2591 |
| C      | -1.5093 | 1.5948  | -0.7506 |
| C      | -2.9031 | 1.2487  | -0.7294 |
| C      | -3.3572 | 0.0698  | -0.2149 |
| H      | -3.6125 | 1.9839  | -1.1475 |
| H      | 2.0124  | -1.9443 | 1.1474  |
| H      | -2.2259 | -4.0132 | 1.7077  |
| H      | 0.2065  | -3.4714 | 1.6764  |
| H      | -3.89   | -2.3872 | 0.8494  |
| H      | 0.6205  | 4.1042  | -1.6652 |
| H      | -1.8086 | 3.5435  | -1.6515 |
| N      | 3.1584  | 0.3309  | 0.2628  |
| B      | -4.8916 | -0.1698 | -0.208  |
| C      | 3.865   | 0.0927  | 1.4692  |
| C      | 5.1341  | -0.5251 | 1.4891  |

|   |         |         |         |
|---|---------|---------|---------|
| C | 3.3085  | 0.5239  | 2.6961  |
| C | 5.8203  | -0.6887 | 2.6866  |
| H | 5.5943  | -0.8787 | 0.5528  |
| C | 4.0056  | 0.3501  | 3.8842  |
| H | 2.3144  | 0.9976  | 2.7145  |
| C | 5.2702  | -0.2548 | 3.8993  |
| H | 6.8132  | -1.165  | 2.6779  |
| H | 3.5532  | 0.6892  | 4.8294  |
| C | 3.8566  | 0.3005  | -0.9703 |
| C | 5.0666  | 1.0185  | -1.1135 |
| C | 3.3452  | -0.3836 | -2.0949 |
| C | 5.7261  | 1.0485  | -2.3351 |
| H | 5.4933  | 1.5561  | -0.2521 |
| C | 4.0153  | -0.3397 | -3.3118 |
| H | 2.4027  | -0.9489 | -2.0181 |
| C | 5.2131  | 0.3728  | -3.4511 |
| H | 6.6697  | 1.6092  | -2.4249 |
| H | 3.593   | -0.8714 | -4.1789 |
| C | 5.9141  | 0.4108  | -4.7319 |
| C | 5.9946  | -0.738  | -5.5326 |
| C | 6.516   | 1.5965  | -5.1781 |
| C | 6.6649  | -0.6998 | -6.7533 |
| H | 5.5315  | -1.6753 | -5.1893 |
| C | 7.1835  | 1.6303  | -6.4006 |
| H | 6.4524  | 2.5057  | -4.5616 |
| C | 7.2602  | 0.4833  | -7.1904 |
| H | 6.7249  | -1.6068 | -7.3726 |
| H | 7.6497  | 2.5659  | -6.7431 |
| H | 7.788   | 0.5118  | -8.1545 |
| C | 5.9974  | -0.4299 | 5.1539  |
| C | 5.9838  | 0.5776  | 6.1296  |
| C | 6.7189  | -1.6073 | 5.3995  |
| C | 6.6791  | 0.4092  | 7.3251  |
| H | 5.4268  | 1.5083  | 5.9444  |
| C | 7.411   | -1.772  | 6.5974  |
| H | 6.7307  | -2.4072 | 4.6439  |
| C | 7.3935  | -0.765  | 7.5622  |
| H | 6.6647  | 1.2064  | 8.0828  |
| H | 7.9716  | -2.7003 | 6.7817  |
| H | 7.9409  | -0.8964 | 8.5067  |
| C | -5.6476 | 0.1355  | -1.5289 |
| C | -5.4627 | -0.6876 | -2.6533 |
| C | -6.4957 | 1.2524  | -1.6332 |
| C | -6.1296 | -0.4049 | -3.8503 |



|   |         |         |         |
|---|---------|---------|---------|
| C | -7.1529 | 1.5235  | -2.8375 |
| C | -6.9797 | 0.6979  | -3.9512 |
| H | -5.9768 | -1.0597 | -4.7215 |
| H | -7.8161 | 2.3991  | -2.9095 |
| C | -5.6404 | -0.6176 | 1.0736  |
| C | -5.5739 | 0.1702  | 2.2372  |
| C | -6.4018 | -1.8019 | 1.1002  |
| C | -6.2483 | -0.2256 | 3.3981  |
| C | -7.0627 | -2.1869 | 2.271   |
| C | -6.9917 | -1.4059 | 3.4271  |
| H | -6.1877 | 0.4046  | 4.2985  |
| H | -7.6529 | -3.1162 | 2.2821  |
| C | -7.6858 | -1.8314 | 4.6642  |
| H | -7.9387 | -0.9518 | 5.3058  |
| H | -8.631  | -2.3779 | 4.424   |
| H | -7.0259 | -2.5167 | 5.2543  |
| C | -4.8061 | 1.4398  | 2.2928  |
| H | -3.8841 | 1.2995  | 2.9119  |
| H | -4.4958 | 1.7826  | 1.2742  |
| H | -5.4228 | 2.247   | 2.7613  |
| C | -6.5234 | -2.6777 | -0.0912 |
| H | -6.7974 | -2.0755 | -0.9949 |
| H | -5.5526 | -3.1952 | -0.3003 |
| H | -7.3073 | -3.4601 | 0.06    |
| C | -6.6924 | 2.1811  | -0.4935 |
| H | -5.8234 | 2.8839  | -0.4196 |
| H | -7.6215 | 2.7887  | -0.6234 |
| H | -6.7714 | 1.6188  | 0.4719  |
| C | -4.5743 | -1.876  | -2.6124 |
| H | -3.9918 | -1.9219 | -1.6569 |
| H | -5.1814 | -2.8125 | -2.6986 |
| H | -3.8501 | -1.8485 | -3.4644 |
| C | -7.6962 | 0.9834  | -5.2156 |
| H | -8.7018 | 0.4916  | -5.2028 |
| H | -7.8471 | 2.0828  | -5.3501 |
| H | -7.1278 | 0.5939  | -6.0957 |

## 5

DFT B3LYP/6-31G(d), gas phase,  $S_0$

E(total): -2318.794324 hartree

Imaginary Freq = 0

Dipole Moment = 0.878698 Debye

| Symbol | X / Å | Y / Å | Z / Å |
|--------|-------|-------|-------|
|--------|-------|-------|-------|

|   |         |         |         |
|---|---------|---------|---------|
| C | -0.6857 | -2.0768 | 0.2409  |
| C | 0.4506  | -1.2961 | 0.4342  |
| C | 0.3905  | 0.0965  | 0.291   |
| C | -0.8502 | 0.7034  | -0.0484 |
| C | -2.0086 | -0.1008 | -0.2435 |
| C | -1.8999 | -1.4906 | -0.0968 |
| C | 1.5562  | 0.9546  | 0.4919  |
| C | -0.9432 | 2.1265  | -0.1892 |
| C | 0.1985  | 2.9397  | 0.0202  |
| C | 1.4438  | 2.3154  | 0.358   |
| C | 0.092   | 4.3308  | -0.1173 |
| H | 0.978   | 4.9618  | 0.0486  |
| C | -1.125  | 4.9127  | -0.4628 |
| C | -2.2522 | 4.1234  | -0.6747 |
| C | -2.1772 | 2.7303  | -0.5403 |
| C | -3.3191 | 1.887   | -0.7537 |
| C | -3.2593 | 0.5331  | -0.5984 |
| H | -4.2639 | 2.3751  | -1.0484 |
| H | -0.6211 | -3.1692 | 0.3594  |
| H | 1.3981  | -1.7908 | 0.7001  |
| H | -2.7919 | -2.1232 | -0.2362 |
| H | -1.1959 | 6.0057  | -0.5697 |
| H | -3.2094 | 4.5906  | -0.9509 |
| B | -4.5716 | -0.2705 | -0.8131 |
| C | -5.3779 | 0.0516  | -2.0999 |
| C | -4.8758 | -0.3199 | -3.3592 |
| C | -6.5987 | 0.7463  | -2.0302 |
| C | -5.5927 | -0.0146 | -4.5212 |
| C | -7.3021 | 1.0468  | -3.201  |
| C | -6.8083 | 0.6684  | -4.452  |
| H | -5.1894 | -0.3163 | -5.4997 |
| H | -8.2589 | 1.5872  | -3.1365 |
| C | -5.0903 | -1.2819 | 0.2413  |
| C | -5.3391 | -0.8568 | 1.5591  |
| C | -5.331  | -2.6285 | -0.0928 |
| C | -5.8106 | -1.7623 | 2.5166  |
| C | -5.794  | -3.5221 | 0.8785  |
| C | -6.0364 | -3.0993 | 2.1876  |
| H | -6.0032 | -1.4119 | 3.5421  |
| H | -5.9758 | -4.5735 | 0.6078  |
| C | -6.5145 | -4.0583 | 3.21    |
| H | -7.0957 | -3.5364 | 4.0095  |
| H | -7.1681 | -4.8398 | 2.7499  |

|   |         |         |         |
|---|---------|---------|---------|
| H | -5.6417 | -4.57   | 3.6892  |
| C | -5.1231 | 0.5464  | 1.9937  |
| H | -4.1945 | 0.6124  | 2.6153  |
| H | -5.0111 | 1.2383  | 1.1218  |
| H | -5.9847 | 0.9001  | 2.6132  |
| C | -5.0985 | -3.1462 | -1.4636 |
| H | -5.5829 | -2.4801 | -2.2225 |
| H | -4.0022 | -3.1886 | -1.6881 |
| H | -5.5163 | -4.1762 | -1.5834 |
| C | -7.1555 | 1.2006  | -0.7326 |
| H | -7.0045 | 0.4253  | 0.0614  |
| H | -6.6431 | 2.1415  | -0.406  |
| H | -8.2501 | 1.411   | -0.8147 |
| C | -3.5914 | -1.0499 | -3.5027 |
| H | -3.0407 | -1.1099 | -2.5293 |
| H | -3.7808 | -2.0926 | -3.8636 |
| H | -2.9338 | -0.5359 | -4.2473 |
| C | -7.5565 | 1.0019  | -5.6859 |
| H | -8.6583 | 1.0022  | -5.4973 |
| H | -7.263  | 2.0205  | -6.0459 |
| H | -7.3369 | 0.2673  | -6.4993 |
| H | 2.3117  | 2.9768  | 0.5183  |
| N | 2.796   | 0.3482  | 0.8615  |
| C | 3.4937  | 0.9224  | 1.9543  |
| C | 4.884   | 1.1642  | 1.9164  |
| C | 2.791   | 1.2276  | 3.1435  |
| C | 5.5415  | 1.6759  | 3.0288  |
| H | 5.4613  | 0.9437  | 1.0045  |
| C | 3.4623  | 1.7413  | 4.2449  |
| H | 1.7036  | 1.0613  | 3.1995  |
| C | 4.8446  | 1.9712  | 4.2073  |
| H | 6.6282  | 1.8481  | 2.9804  |
| H | 2.8963  | 1.9757  | 5.1602  |
| C | 5.5426  | 2.5086  | 5.3724  |
| C | 5.207   | 2.076   | 6.6637  |
| C | 6.5574  | 3.464   | 5.2155  |
| C | 5.8748  | 2.589   | 7.7737  |
| H | 4.4173  | 1.3215  | 6.7978  |
| C | 7.221   | 3.9755  | 6.3287  |
| H | 6.8241  | 3.8156  | 4.2075  |
| C | 6.8822  | 3.5395  | 7.6094  |
| H | 5.6063  | 2.2411  | 8.782   |
| H | 8.0135  | 4.7265  | 6.1953  |
| H | 7.4075  | 3.9437  | 8.4866  |

|   |        |         |         |
|---|--------|---------|---------|
| C | 3.52   | -0.3426 | -0.1419 |
| C | 4.4817 | -1.3131 | 0.2236  |
| C | 3.2661 | -0.1337 | -1.5153 |
| C | 5.1512 | -2.0415 | -0.7507 |
| H | 4.7058 | -1.4932 | 1.2869  |
| C | 3.9417 | -0.8744 | -2.4779 |
| H | 2.5202 | 0.612   | -1.8336 |
| C | 4.8929 | -1.8356 | -2.1131 |
| H | 5.9    | -2.7892 | -0.4457 |
| H | 3.7206 | -0.7028 | -3.5431 |
| C | 5.6019 | -2.6074 | -3.1305 |
| C | 6.0346 | -1.9936 | -4.3152 |
| C | 5.8594 | -3.9724 | -2.9363 |
| C | 6.7118 | -2.7315 | -5.2837 |
| H | 5.8437 | -0.9218 | -4.475  |
| C | 6.5352 | -4.7066 | -3.9086 |
| H | 5.5179 | -4.4658 | -2.014  |
| C | 6.9633 | -4.0887 | -5.0834 |
| H | 7.0496 | -2.2403 | -6.2081 |
| H | 6.7297 | -5.7773 | -3.7482 |
| H | 7.4972 | -4.6696 | -5.8492 |
